# Supplementary material for: Synthesis and Antimicrobial Activity of a New Series of Thiazolidine-2,4-diones Carboxamide and Amino Acid Derivatives
Source: MDPI journal article supplement (doi:10.3390/molecules25010105), 2019-12-27

## Supporting Information

# Synthesis of and Antimicrobial Activity a New Series of Thiazolidine-2, 4-diones Carboxamide and Amino acid Derivatives

Rakia Abd Alhameed, Zainab Almarhoon, Sarah I. Bukhari, Ayman El-Faham,\* Beatriz G. de la Torre,<sup>4,5</sup> Fernando Albericio\*

### Table of Content

|            |                                                                |
|------------|----------------------------------------------------------------|
| Figure S1  | <sup>1</sup> H- and <sup>13</sup> C-NMR for compound <b>3b</b> |
| Figure S2  | <sup>1</sup> H- and <sup>13</sup> C-NMR for compound <b>3c</b> |
| Figure S3  | <sup>1</sup> H- and <sup>13</sup> C-NMR for compound <b>3e</b> |
| Figure S4  | <sup>1</sup> H- and <sup>13</sup> C-NMR for compound <b>4a</b> |
| Figure S5  | <sup>1</sup> H- and <sup>13</sup> C-NMR for compound <b>4b</b> |
| Figure S6  | <sup>1</sup> H- and <sup>13</sup> C-NMR for compound <b>4c</b> |
| Figure S7  | <sup>1</sup> H- and <sup>13</sup> C-NMR for compound <b>4d</b> |
| Figure S8  | <sup>1</sup> H- and <sup>13</sup> C-NMR for compound <b>4e</b> |
| Figure S9  | <sup>1</sup> H- and <sup>13</sup> C-NMR for compound <b>4f</b> |
| Figure S10 | <sup>1</sup> H- and <sup>13</sup> C-NMR for compound <b>4g</b> |
| Figure S11 | <sup>1</sup> H- and <sup>13</sup> C-NMR for compound <b>4h</b> |
| Figure S12 | <sup>1</sup> H- and <sup>13</sup> C-NMR for compound <b>4i</b> |
| Figure S13 | <sup>1</sup> H- and <sup>13</sup> C-NMR for compound <b>4j</b> |
| Figure S14 | <sup>1</sup> H- and <sup>13</sup> C-NMR for compound <b>4k</b> |
| Figure S15 | <sup>1</sup> H- and <sup>13</sup> C-NMR for compound <b>4l</b> |
| Figure S16 | <sup>1</sup> H- and <sup>13</sup> C-NMR for compound <b>4m</b> |
| Figure S17 | <sup>1</sup> H- and <sup>13</sup> C-NMR for compound <b>4n</b> |
| Figure S18 | <sup>1</sup> H- and <sup>13</sup> C-NMR for compound <b>4o</b> |
| Figure S19 | <sup>1</sup> H- and <sup>13</sup> C-NMR for compound <b>4p</b> |
| Figure S20 | <sup>1</sup> H- and <sup>13</sup> C-NMR for compound <b>4q</b> |
| Figure S21 | <sup>1</sup> H- and <sup>13</sup> C-NMR for compound <b>4r</b> |

|                   |                                                                |
|-------------------|----------------------------------------------------------------|
| <b>Figure S22</b> | $^1\text{H}$ - and $^{13}\text{C}$ -NMR for compound <b>4s</b> |
| <b>Figure S23</b> | $^1\text{H}$ - and $^{13}\text{C}$ -NMR for compound <b>5a</b> |
| <b>Figure S24</b> | $^1\text{H}$ - and $^{13}\text{C}$ -NMR for compound <b>5b</b> |
| <b>Figure S25</b> | $^1\text{H}$ - and $^{13}\text{C}$ -NMR for compound <b>5c</b> |
| <b>Figure S26</b> | $^1\text{H}$ - and $^{13}\text{C}$ -NMR for compound <b>5d</b> |
| <b>Figure S27</b> | $^1\text{H}$ - and $^{13}\text{C}$ -NMR for compound <b>5e</b> |
| <b>Figure S28</b> | $^1\text{H}$ - and $^{13}\text{C}$ -NMR for compound <b>5f</b> |
| <b>Figure S29</b> | $^1\text{H}$ - and $^{13}\text{C}$ -NMR for compound <b>5g</b> |
| <b>Figure S30</b> | $^1\text{H}$ - and $^{13}\text{C}$ -NMR for compound <b>5h</b> |
| <b>Figure S31</b> | $^1\text{H}$ - and $^{13}\text{C}$ -NMR for compound <b>5i</b> |
| <b>Figure S32</b> | $^1\text{H}$ - and $^{13}\text{C}$ -NMR for compound <b>5j</b> |
| <b>Figure S33</b> | $^1\text{H}$ - and $^{13}\text{C}$ -NMR for compound <b>5k</b> |
| <b>Figure S34</b> | $^1\text{H}$ - and $^{13}\text{C}$ -NMR for compound <b>5l</b> |
| <b>Figure S35</b> | $^1\text{H}$ - and $^{13}\text{C}$ -NMR for compound <b>5m</b> |
| <b>Figure S36</b> | $^1\text{H}$ - and $^{13}\text{C}$ -NMR for compound <b>5n</b> |
| <b>Figure S37</b> | $^1\text{H}$ - and $^{13}\text{C}$ -NMR for compound <b>5o</b> |

Figure S1  $^1\text{H}$ - and  $^{13}\text{C}$ -NMR for compound **3b**

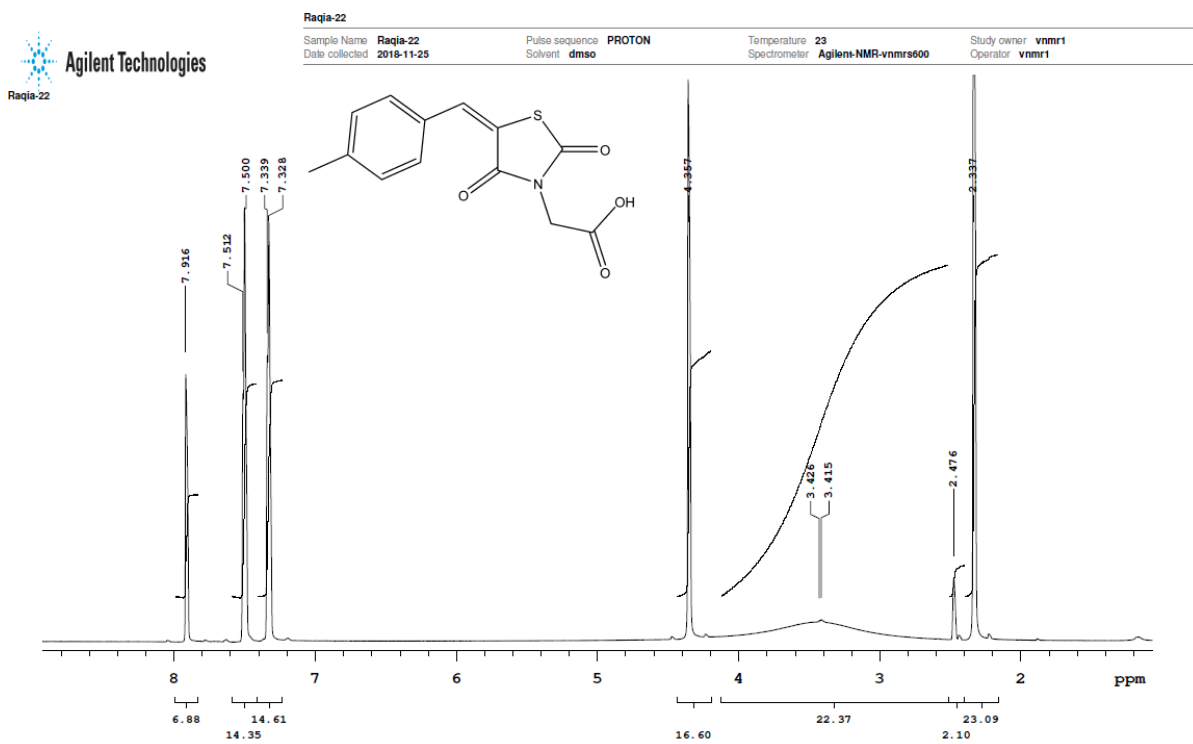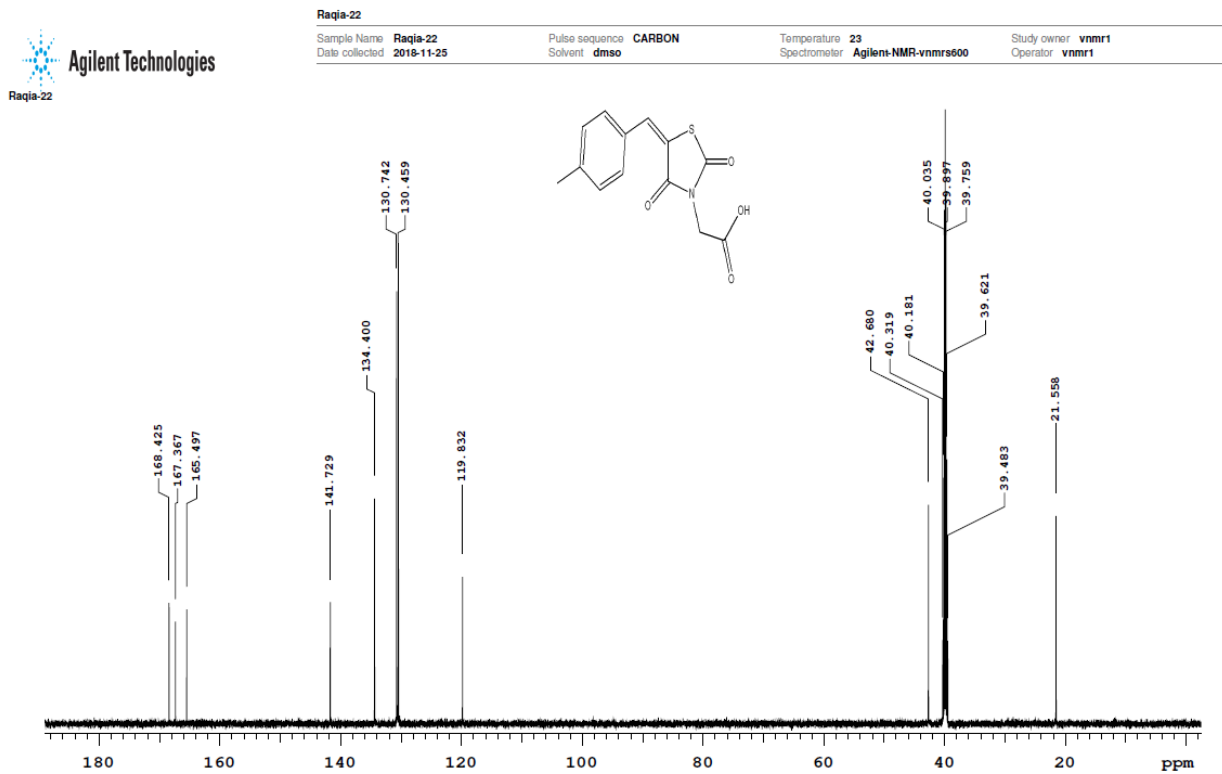

Figure S2  $^1\text{H}$ - and  $^{13}\text{C}$ -NMR for compound **3c**

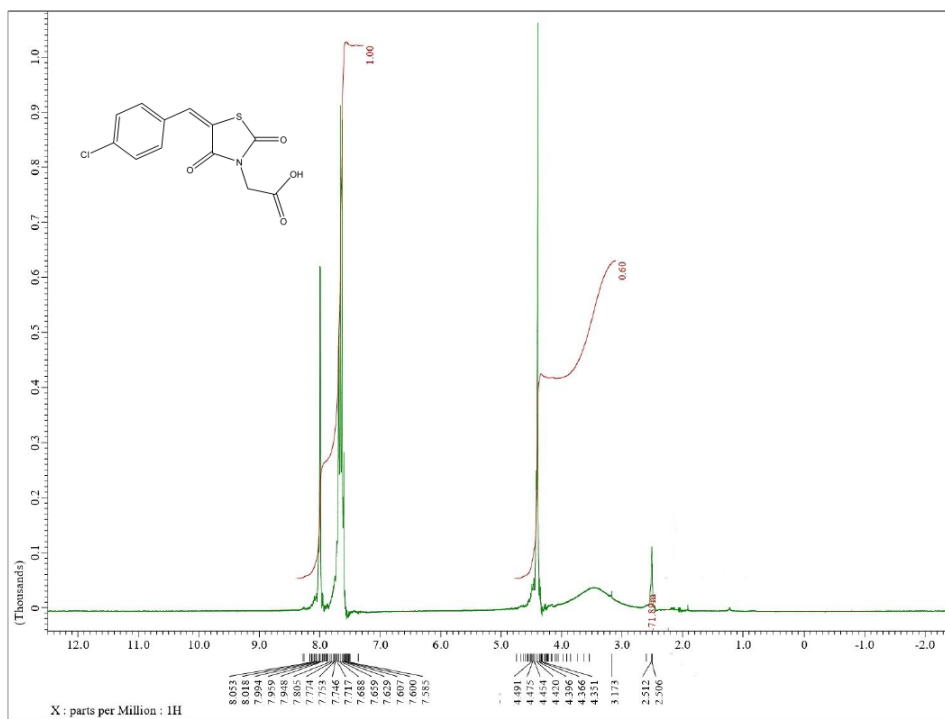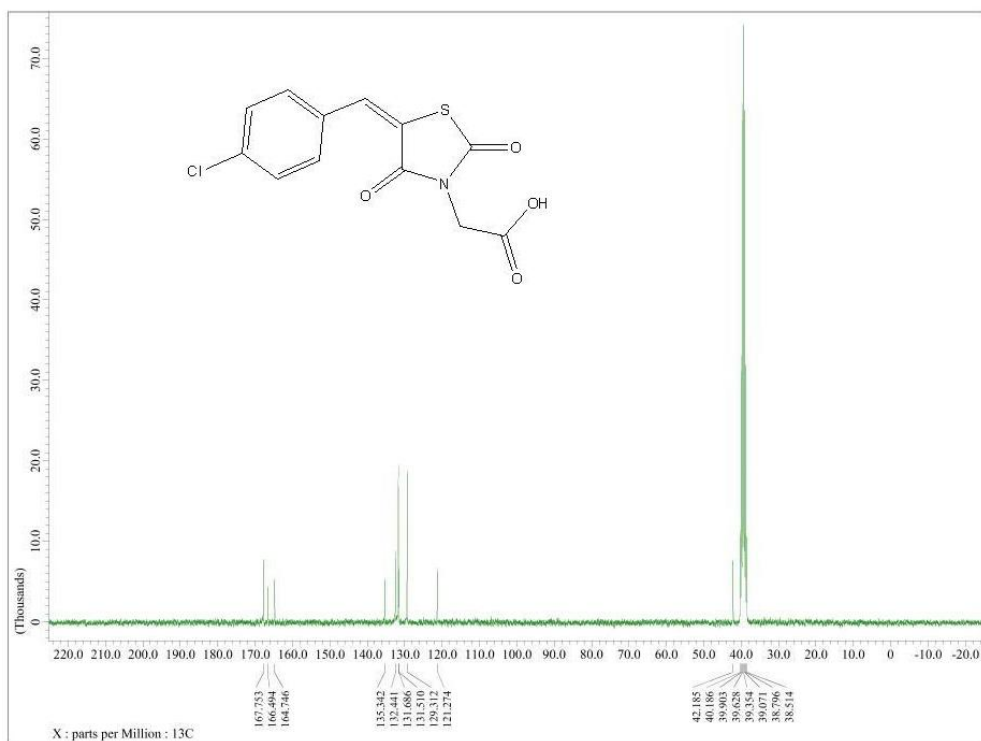

Figure S3  $^1\text{H}$ - and  $^{13}\text{C}$ -NMR for compound **3e**

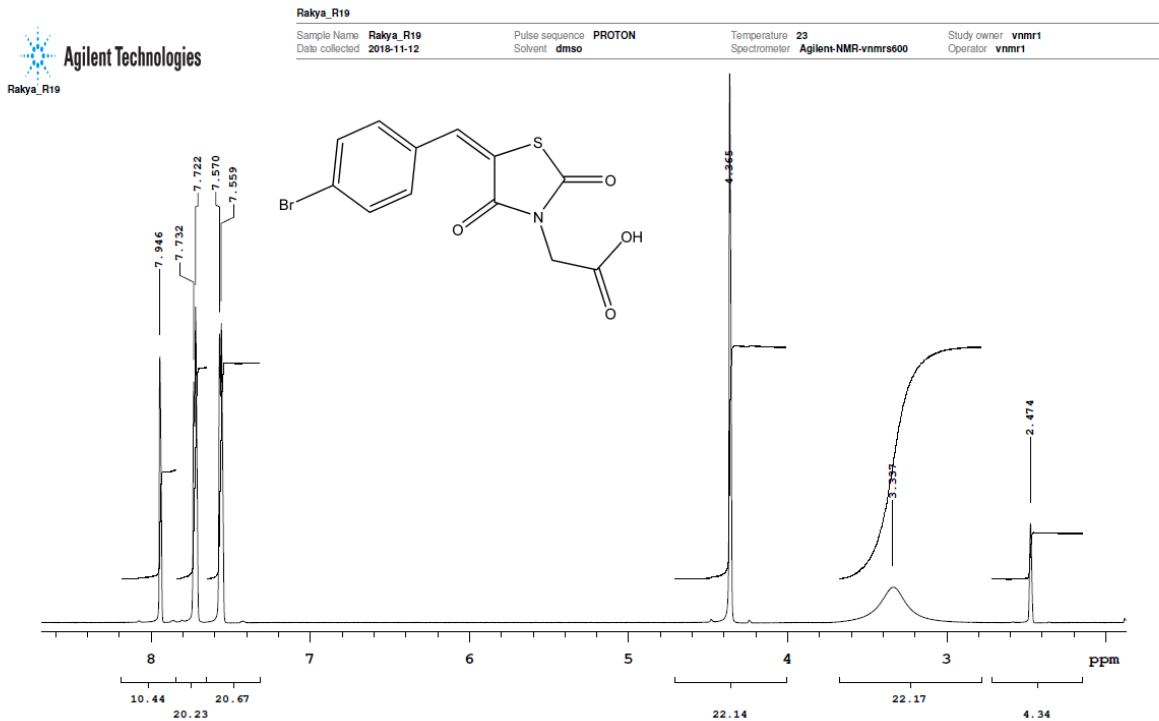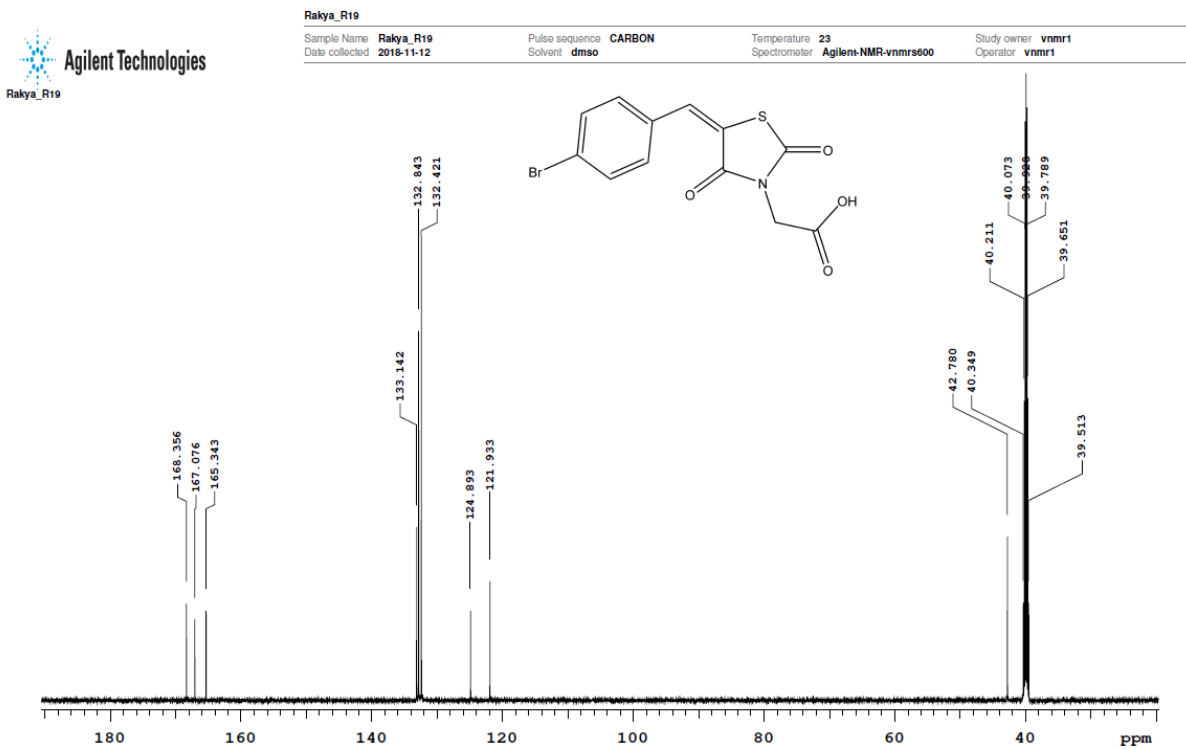

Figure S4  $^1\text{H}$ - and  $^{13}\text{C}$ -NMR for compound 4a

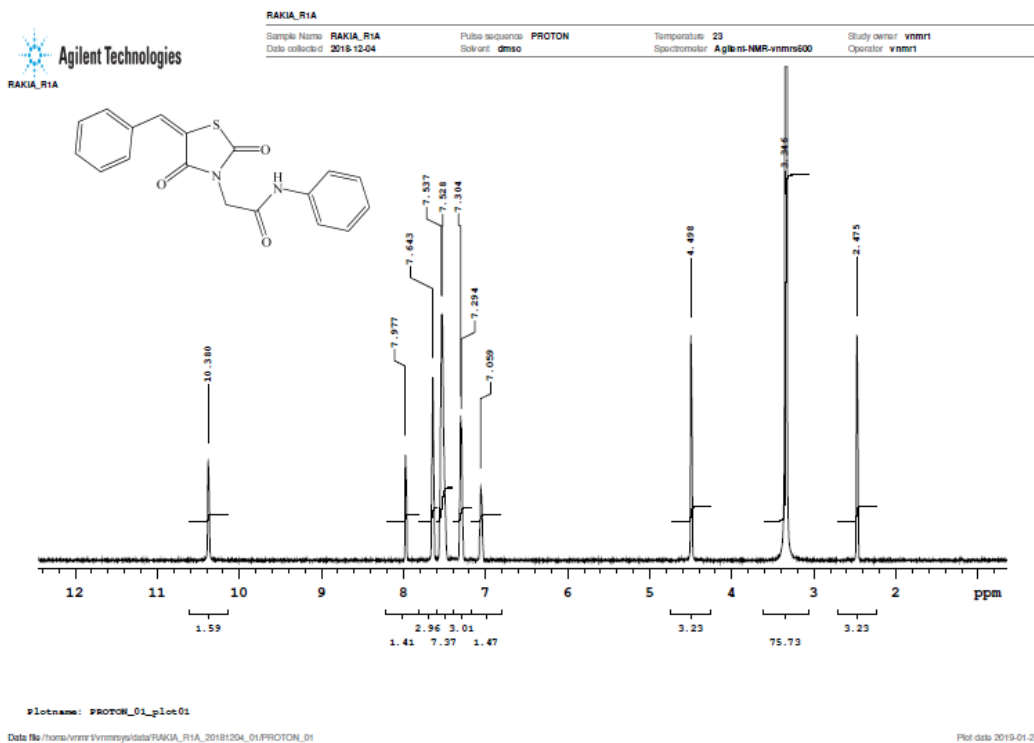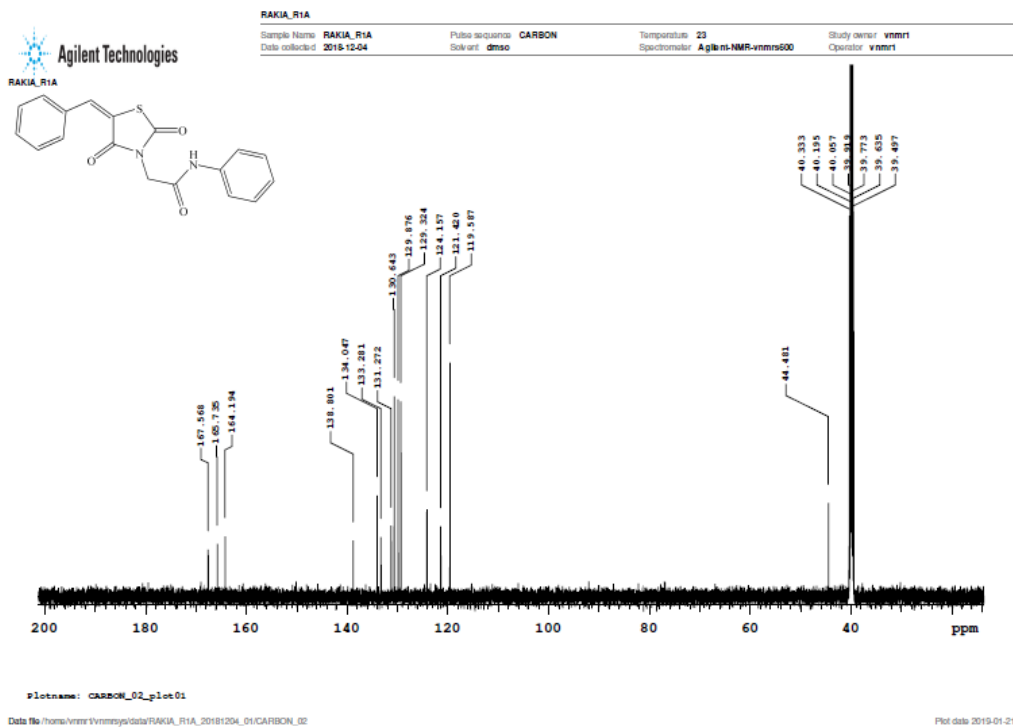

Figure S5  $^1\text{H}$ - and  $^{13}\text{C}$ -NMR for compound 4b

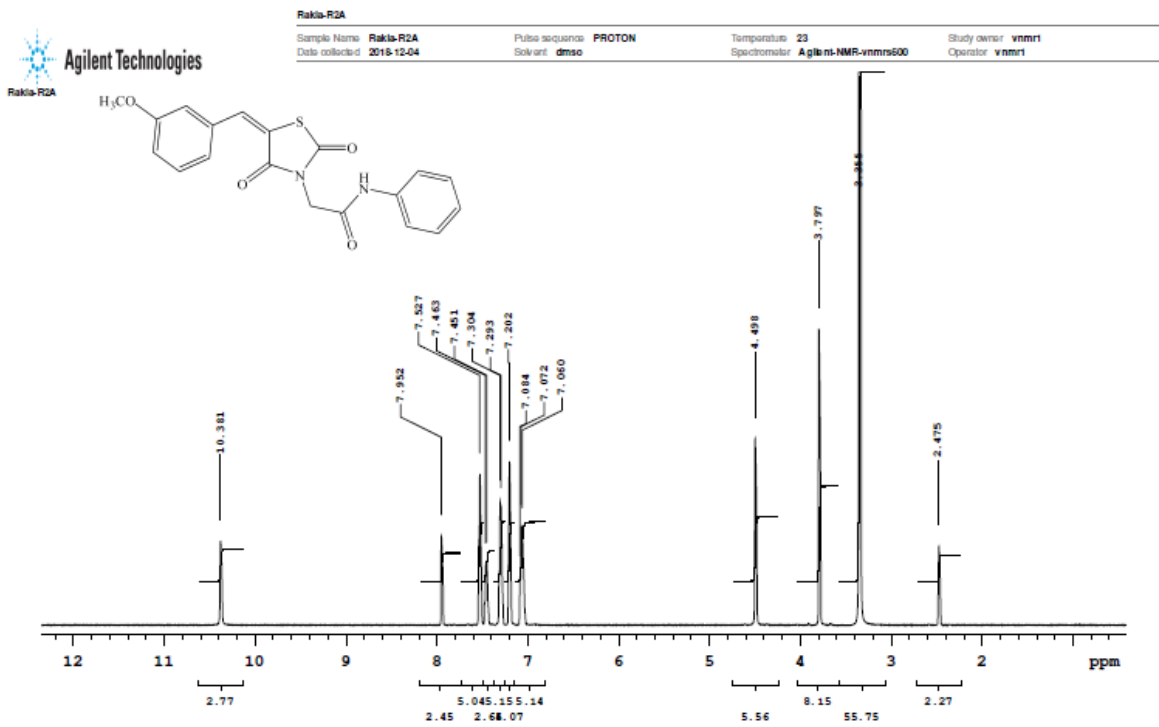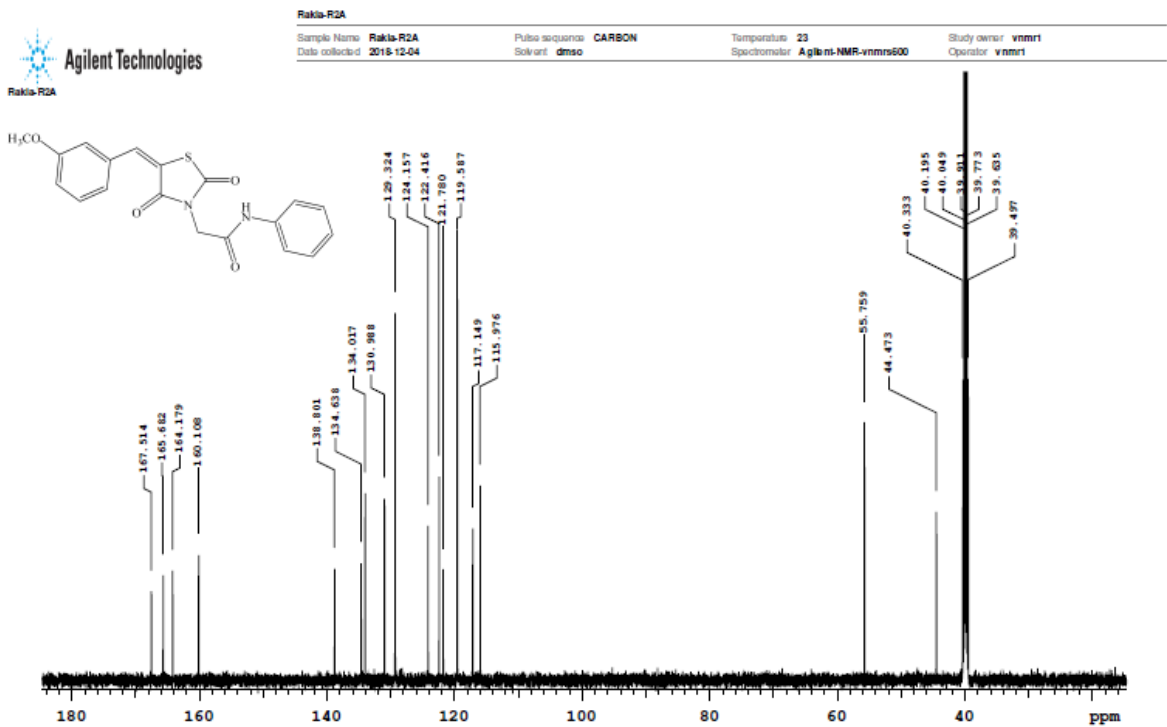

Plotname: CARBON 01 plot01

Figure S6  $^1\text{H}$ - and  $^{13}\text{C}$ -NMR for compound 4c

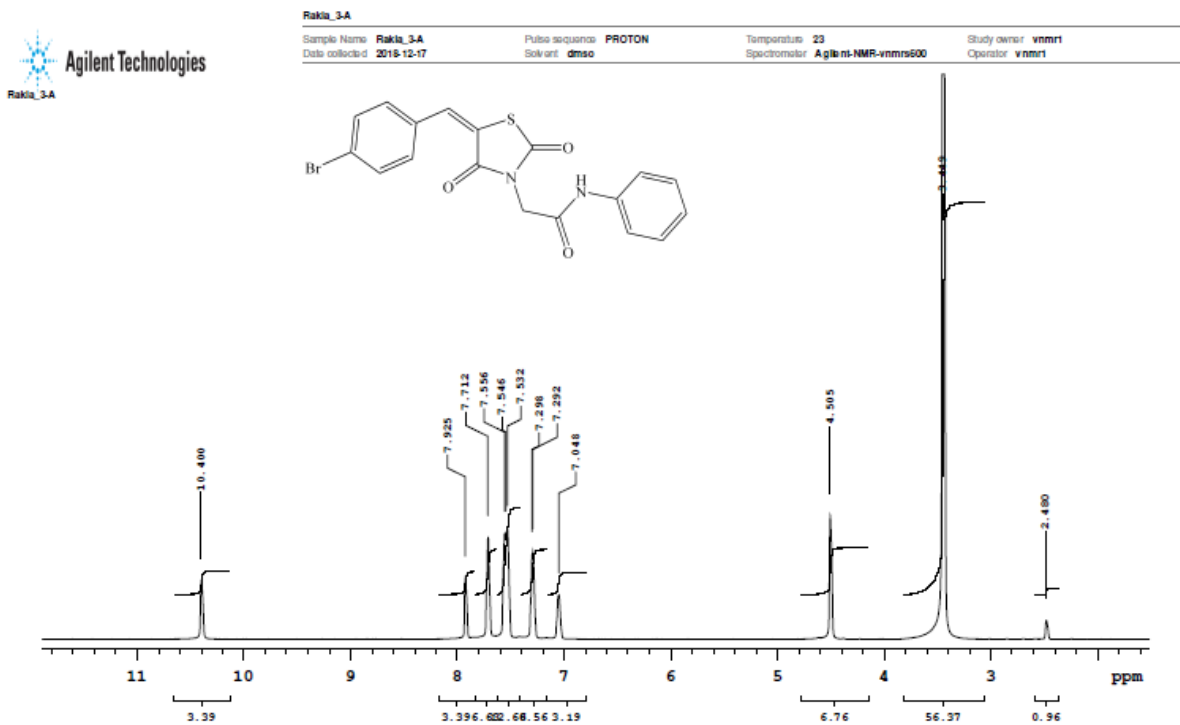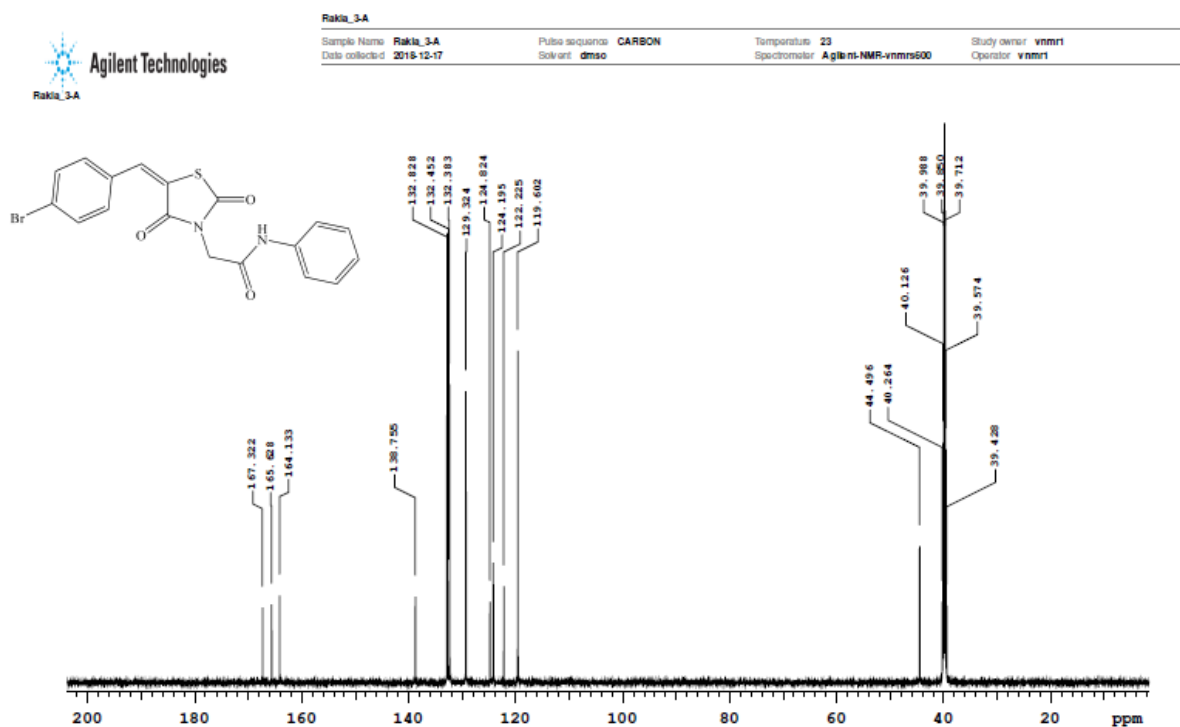



Figure S7  $^1\text{H}$ - and  $^{13}\text{C}$ -NMR for compound 4d

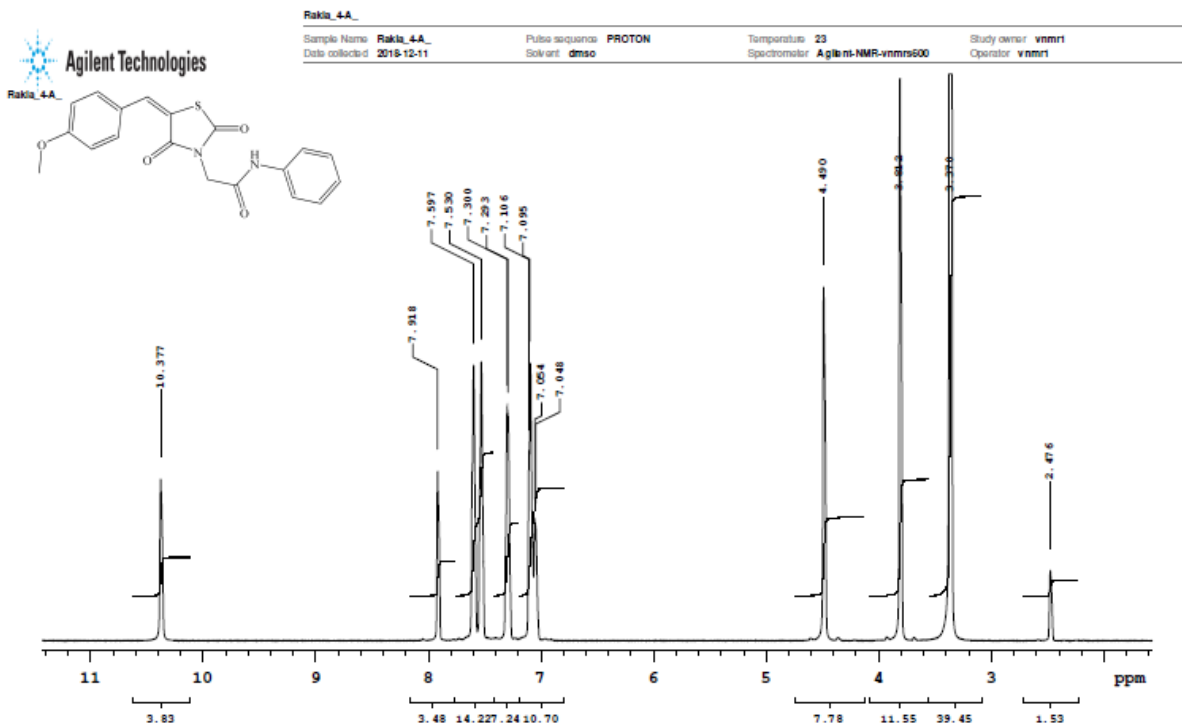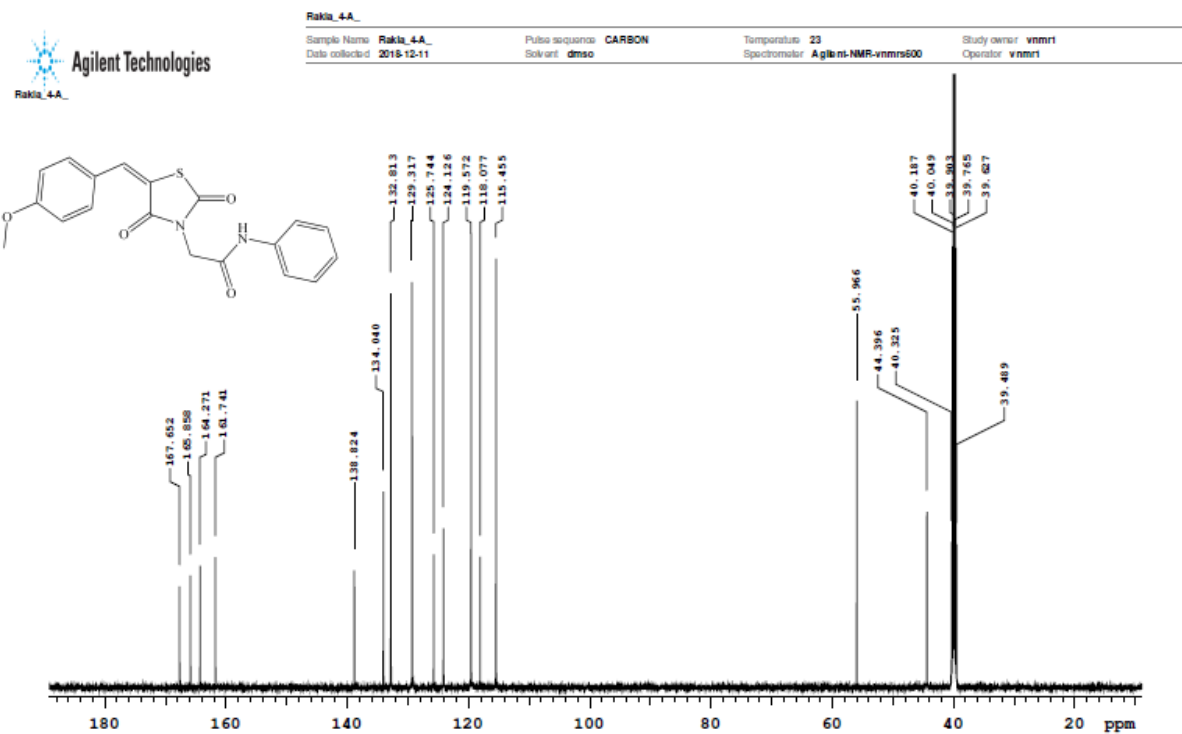

Figure S8  $^1\text{H}$ - and  $^{13}\text{C}$ -NMR for compound 4e

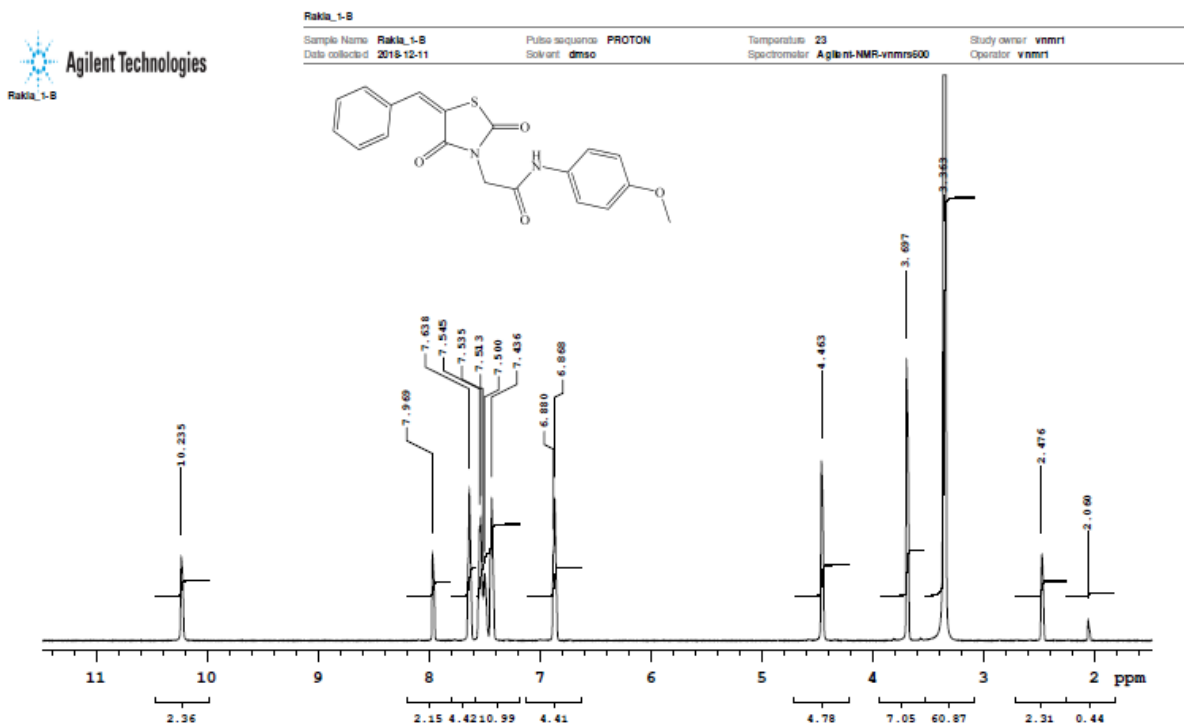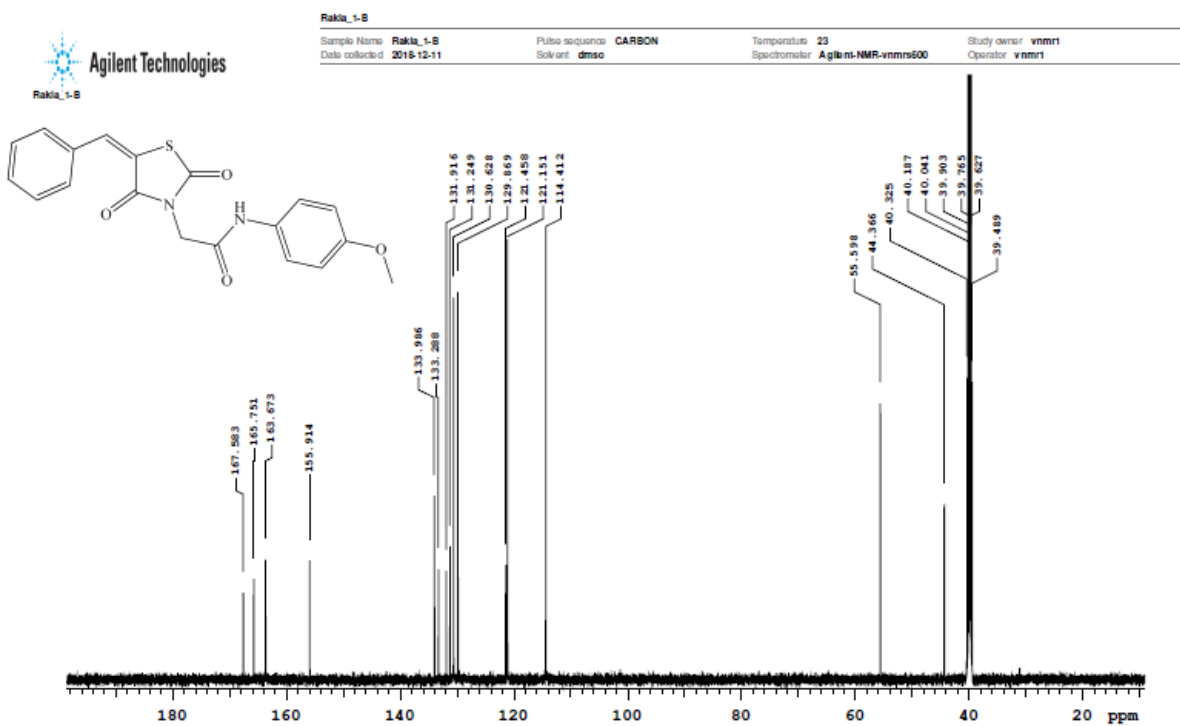

Figure S9  $^1\text{H}$ - and  $^{13}\text{C}$ -NMR for compound 4f

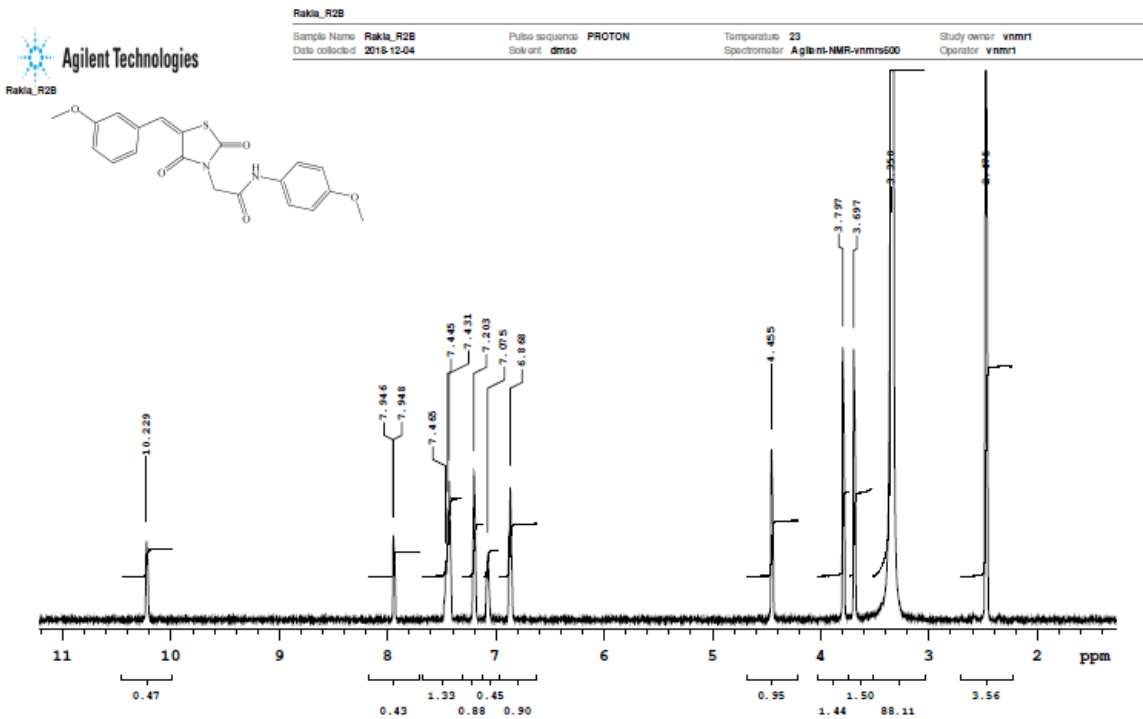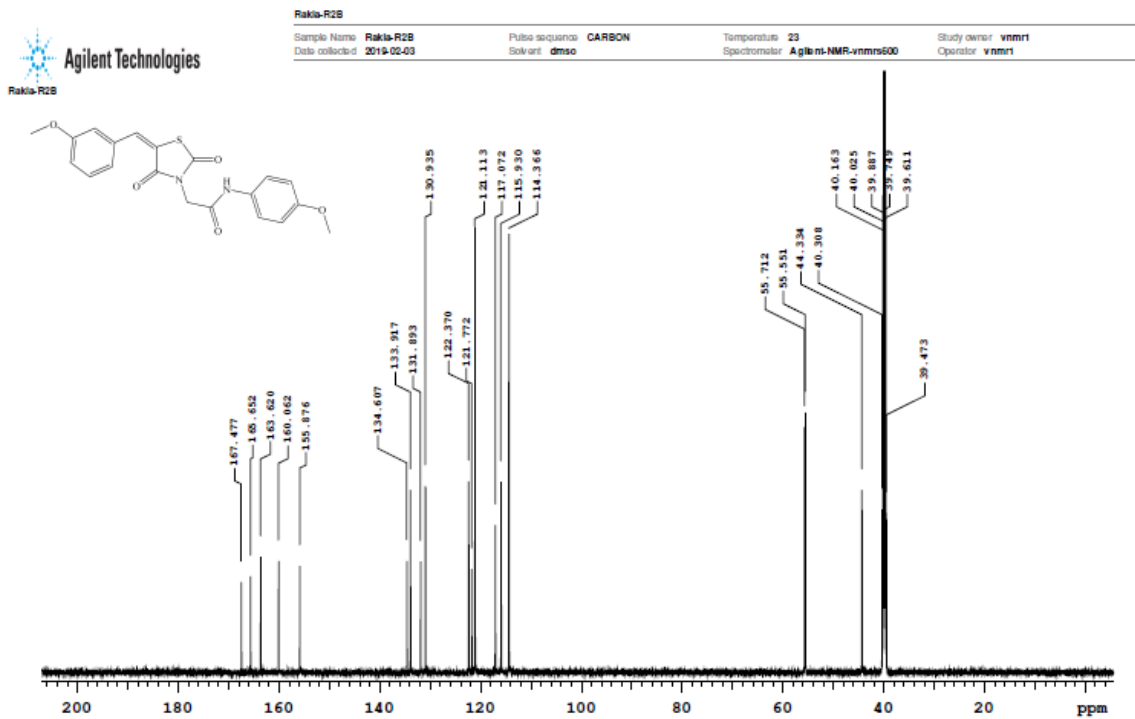

Figure S10  $^1\text{H}$ - and  $^{13}\text{C}$ -NMR for compound **4g**

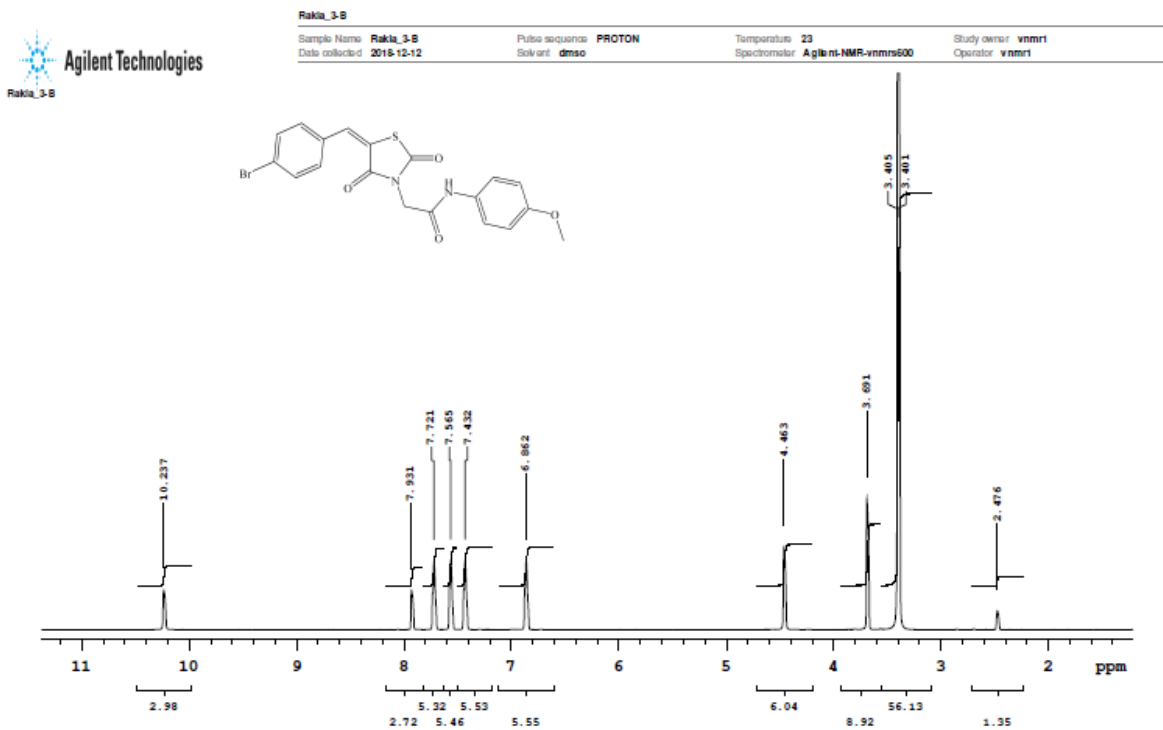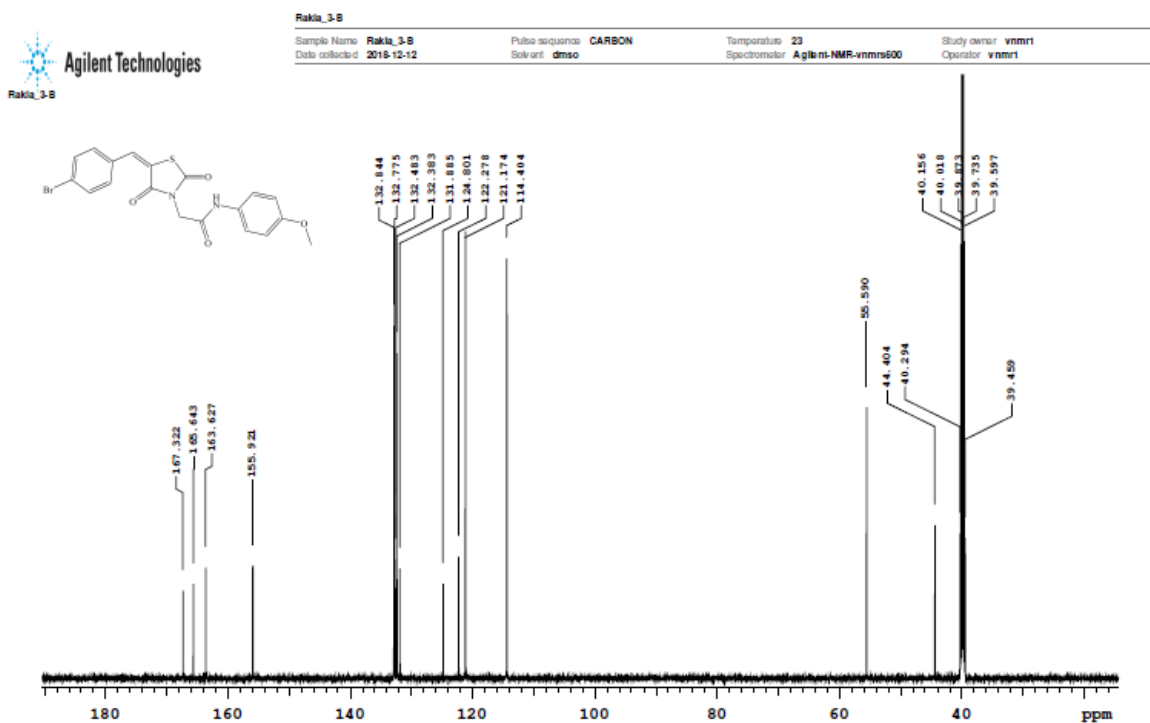

Figure S11  $^1\text{H}$ - and  $^{13}\text{C}$ -NMR for compound 4h

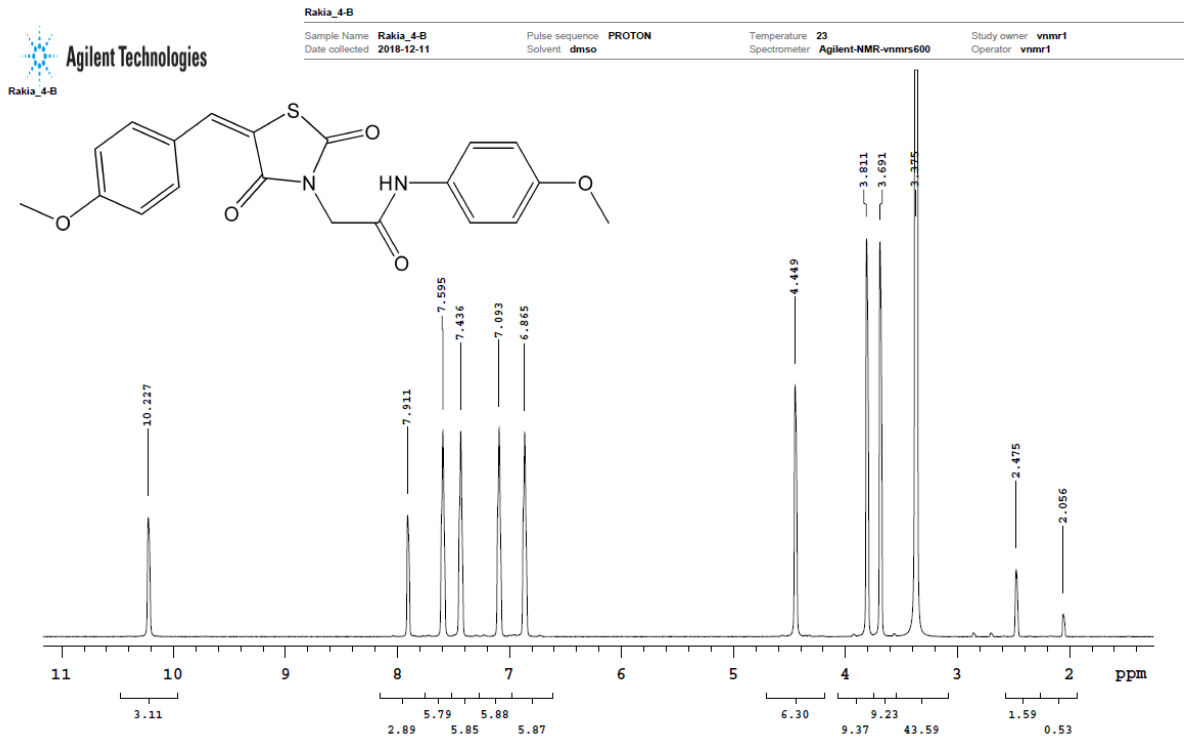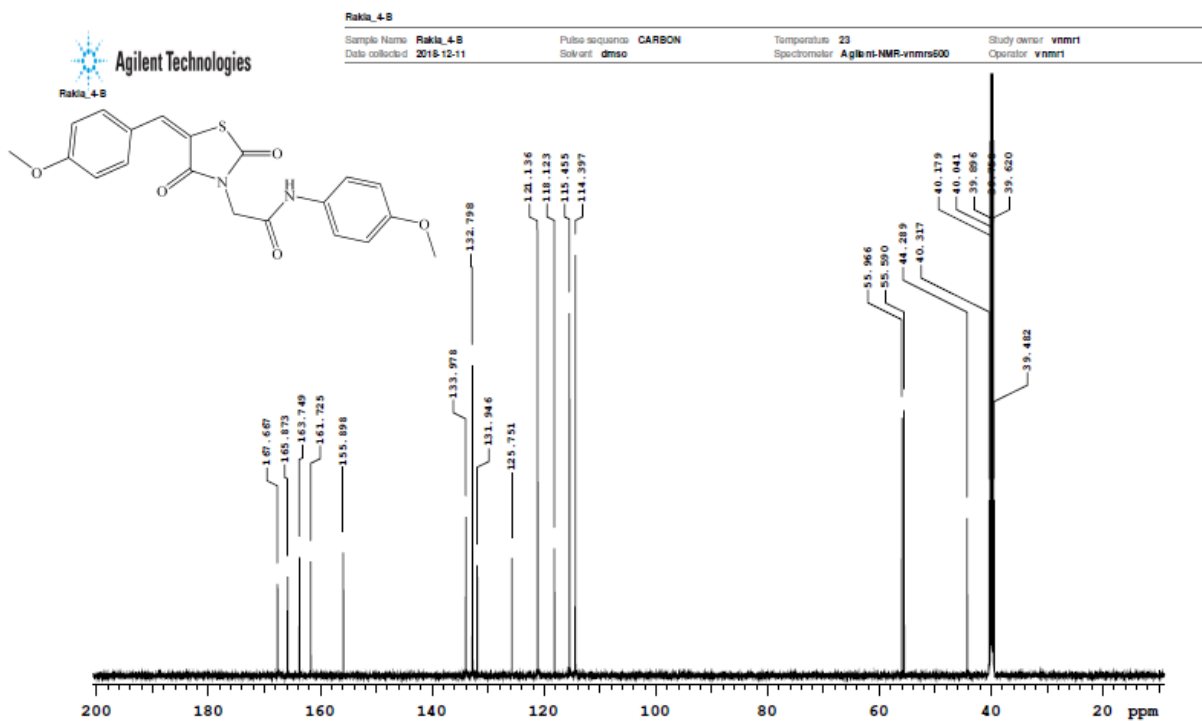

Figure S12  $^1\text{H}$ - and  $^{13}\text{C}$ -NMR for compound 4i

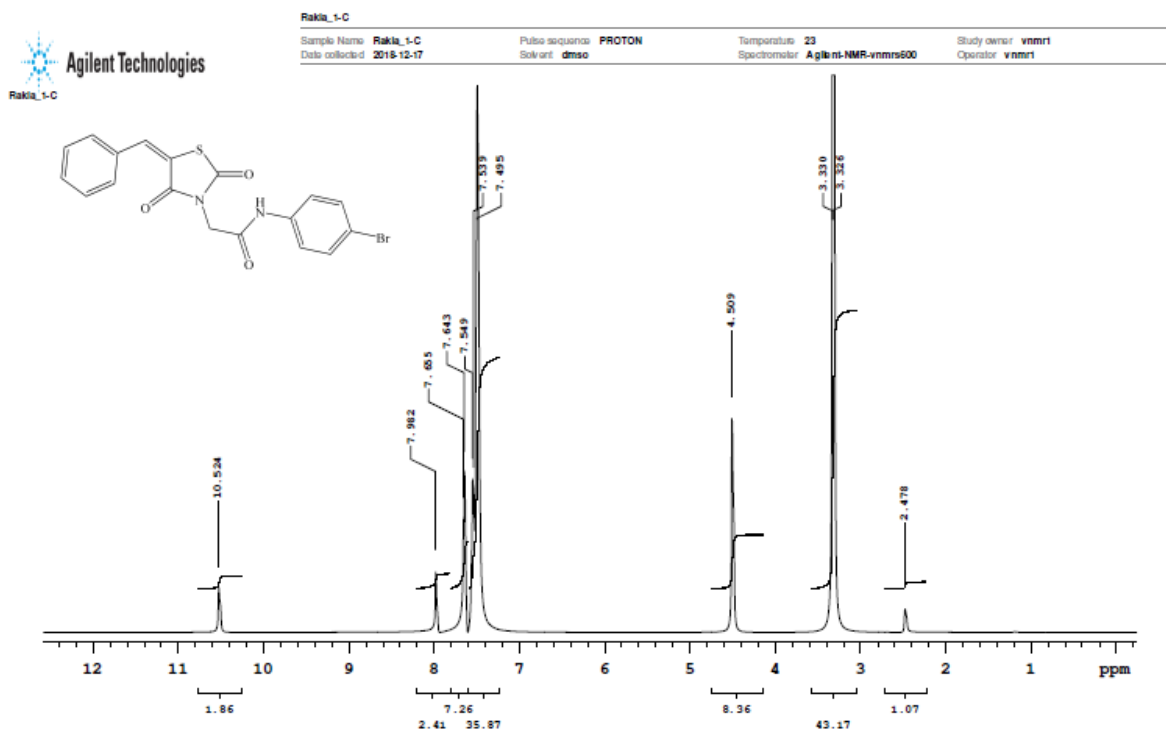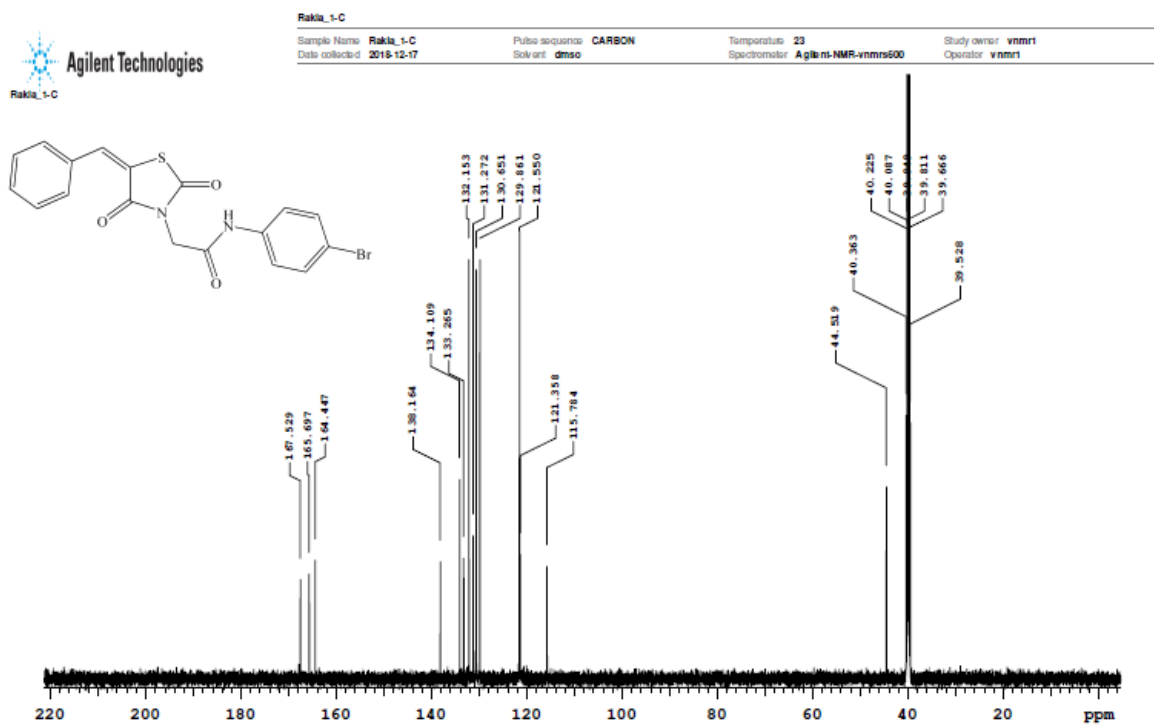

Figure S13  $^1\text{H}$ - and  $^{13}\text{C}$ -NMR for compound 4j

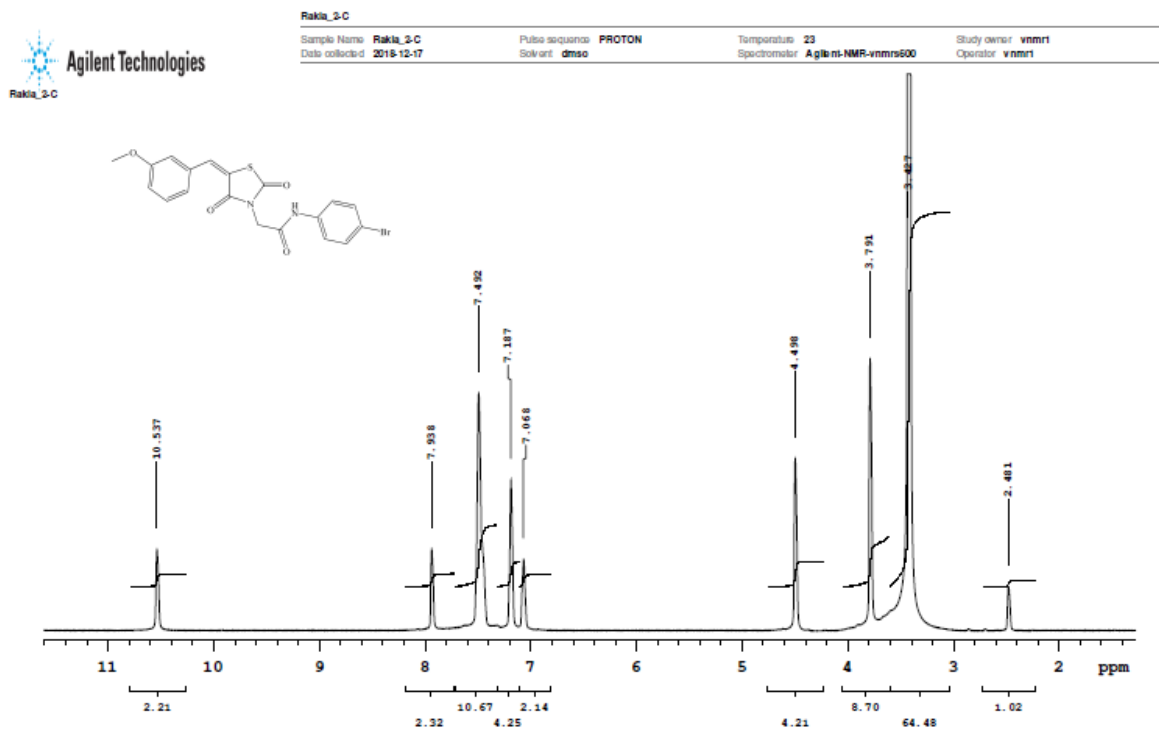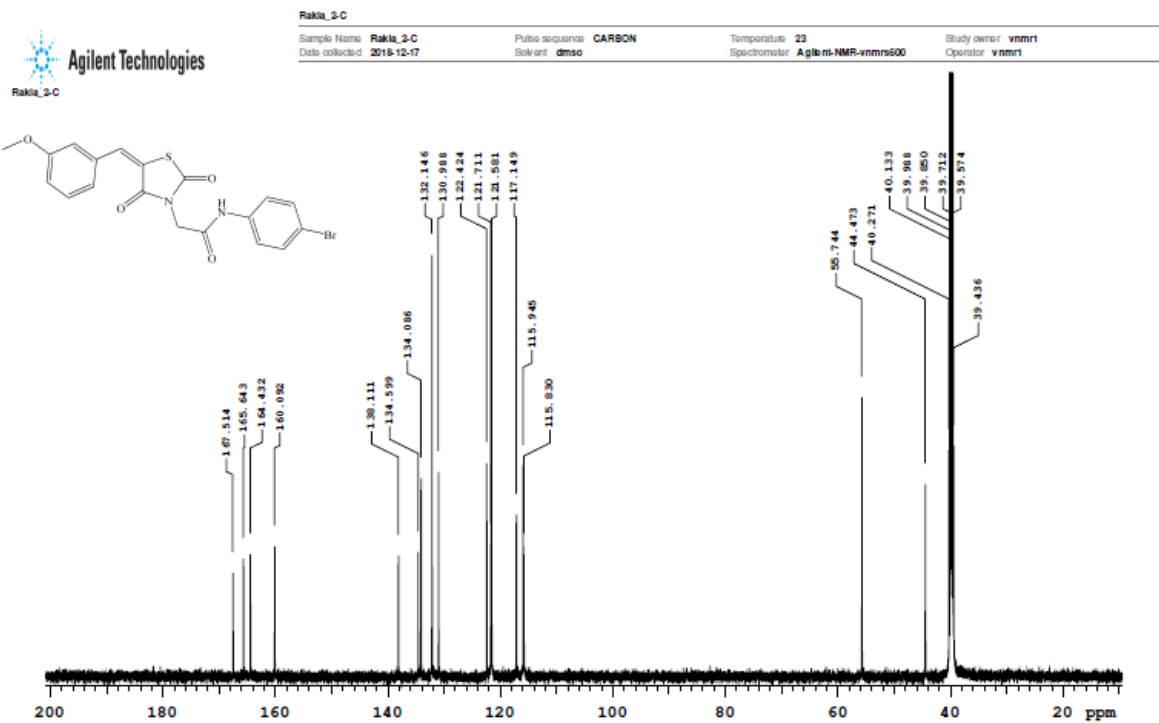

Figure S14  $^1\text{H}$ - and  $^{13}\text{C}$ -NMR for compound 4k

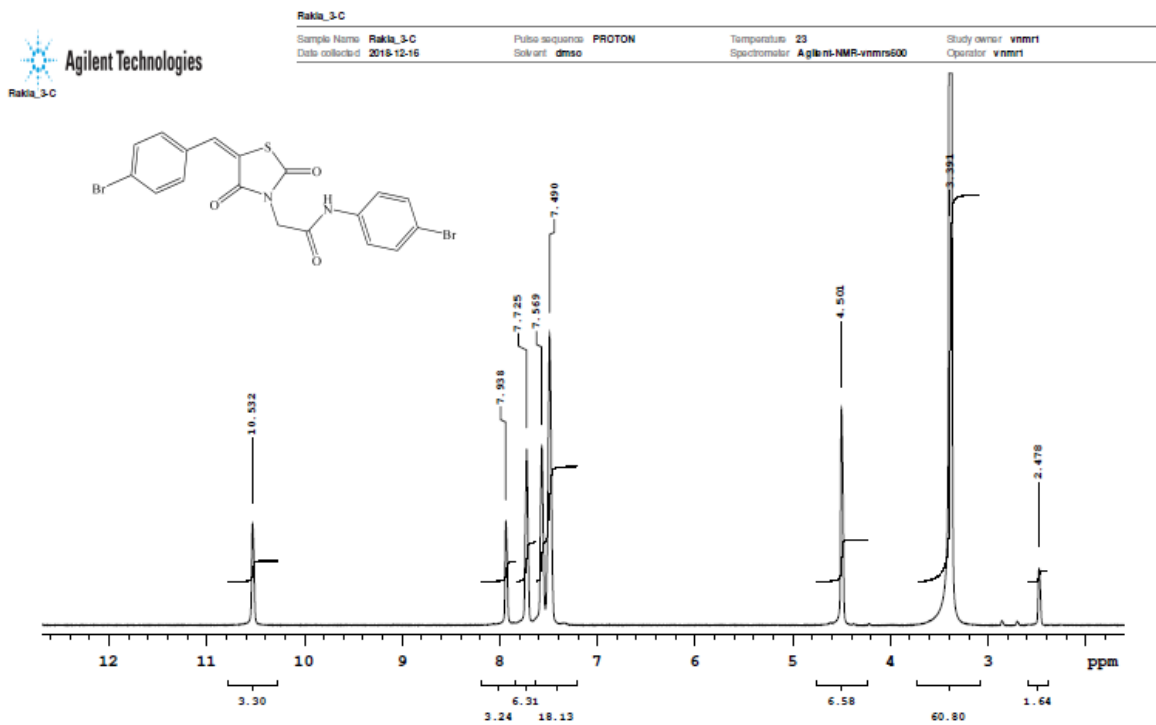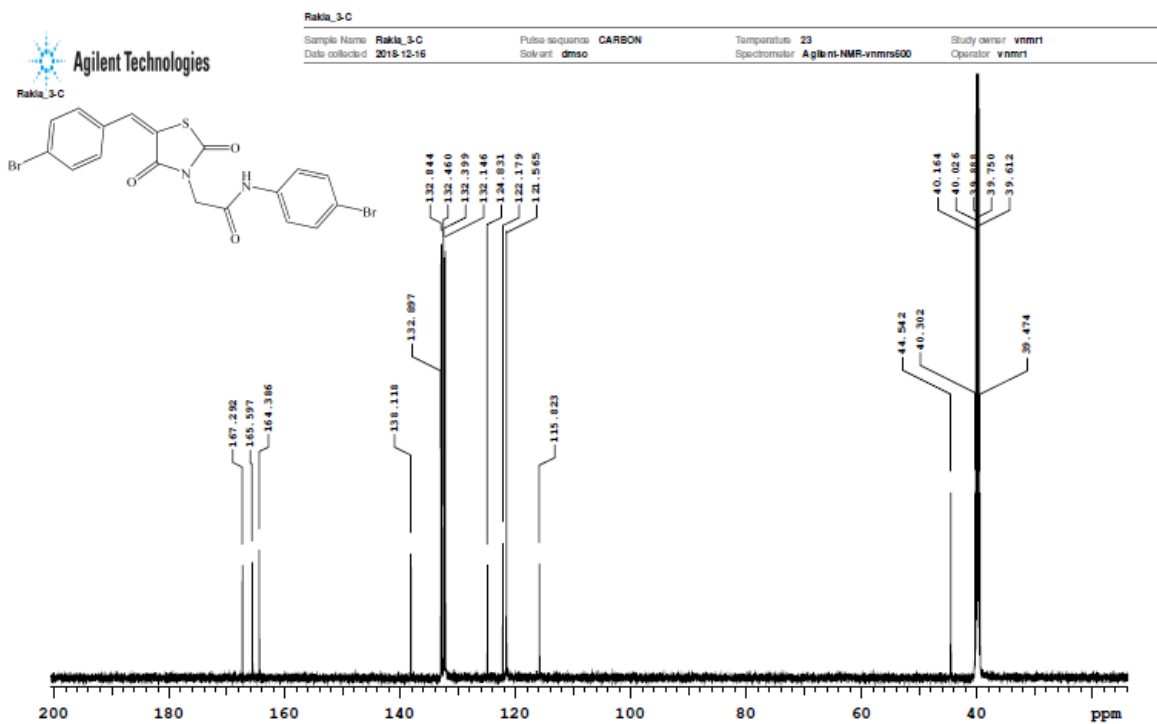



Figure S15  $^1\text{H}$ - and  $^{13}\text{C}$ -NMR for compound **4l**

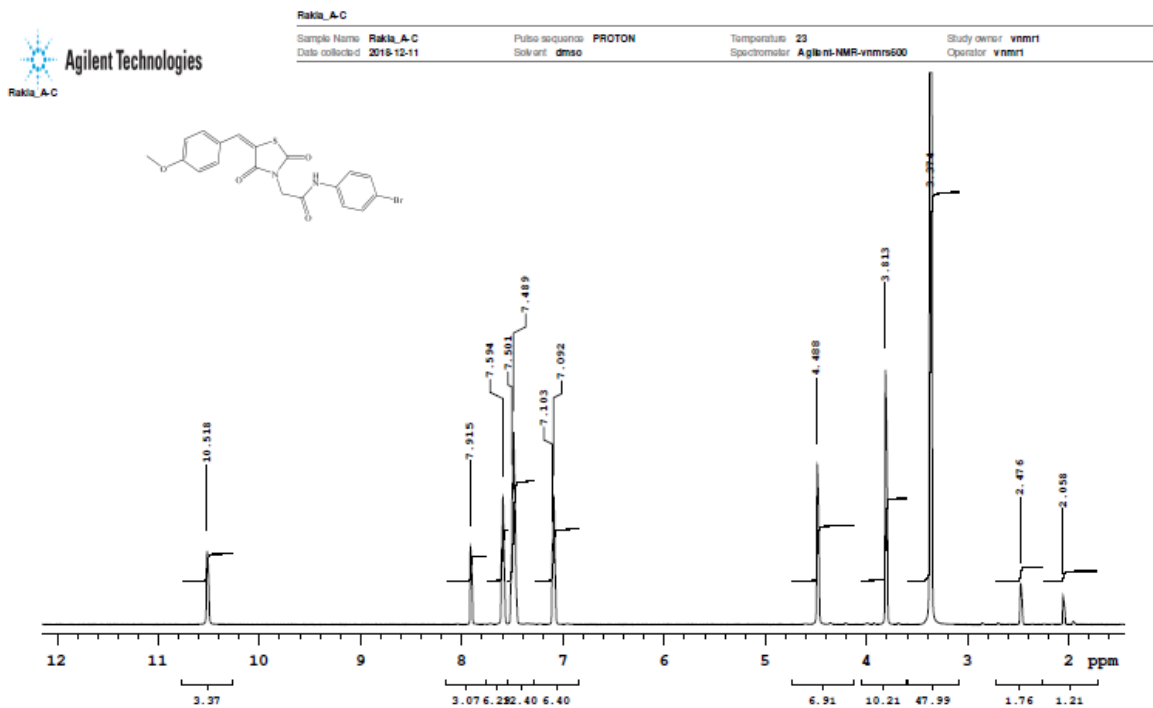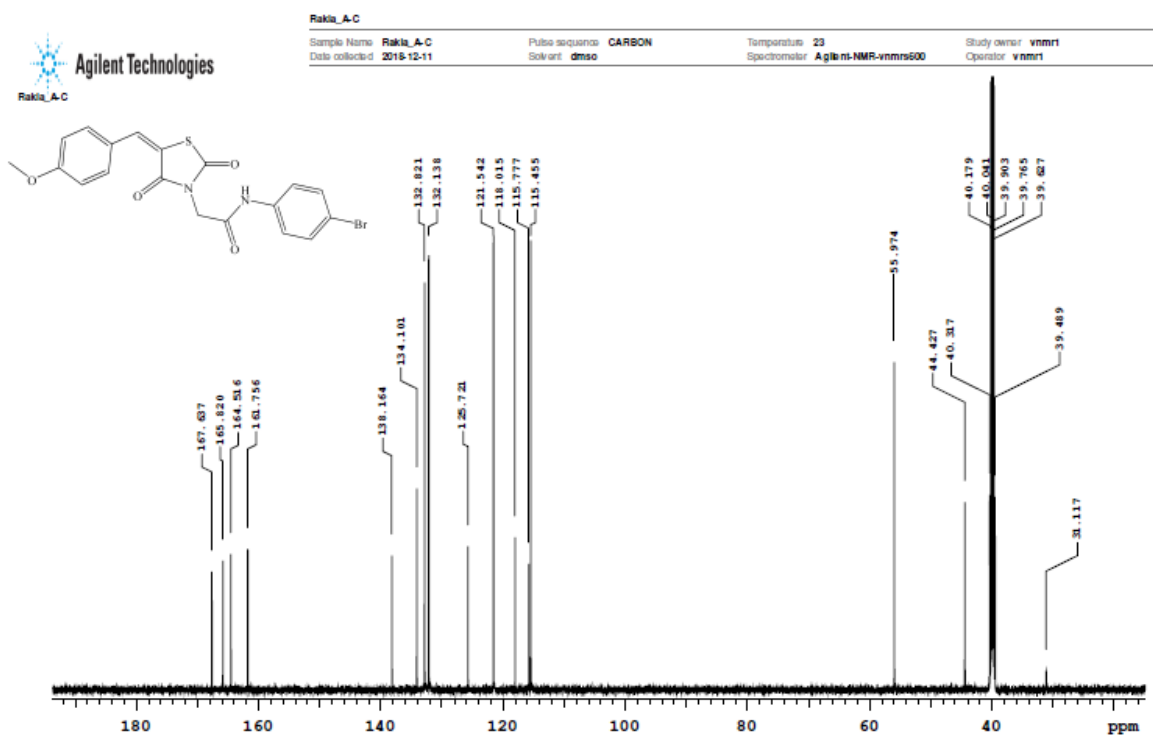

Figure S16  $^1\text{H}$ - and  $^{13}\text{C}$ -NMR for compound **4m**

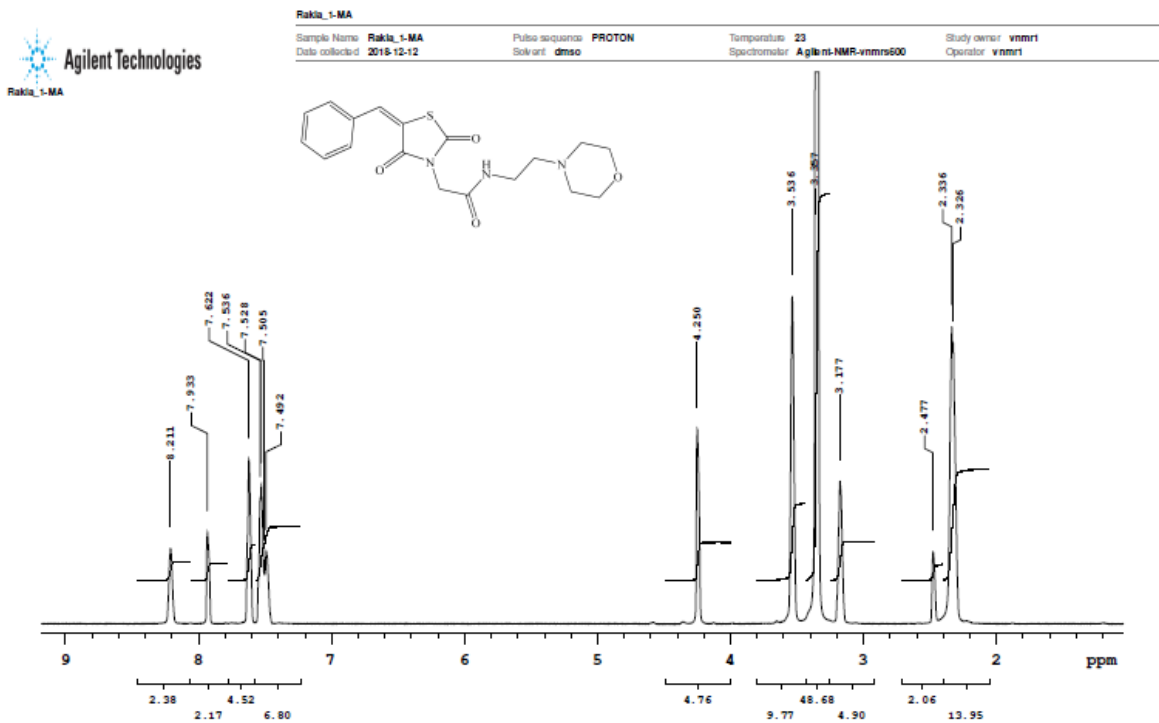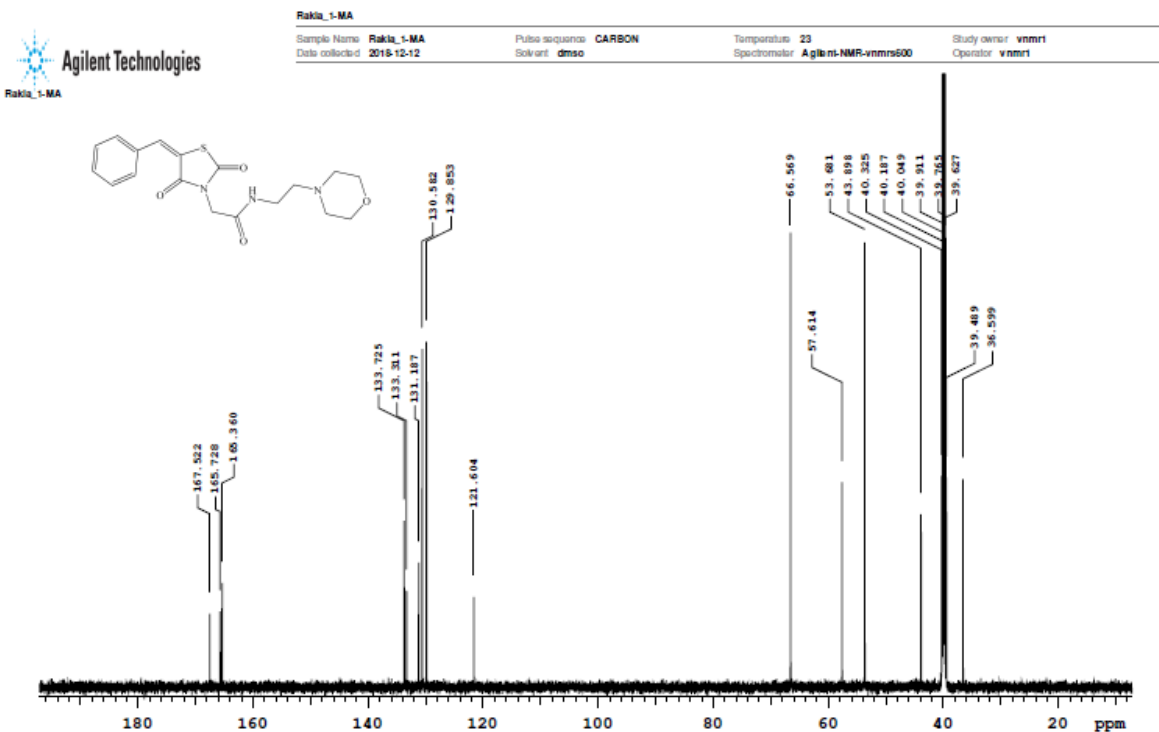

Figure S17  $^1\text{H}$ - and  $^{13}\text{C}$ -NMR for compound 4n

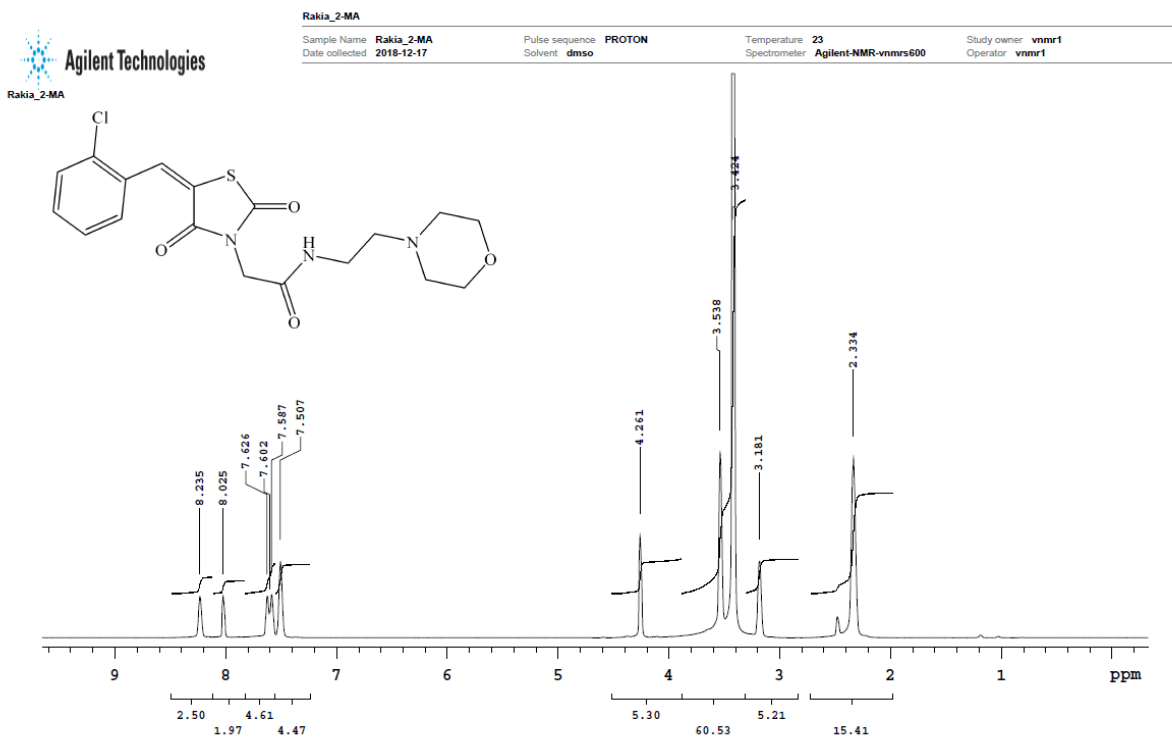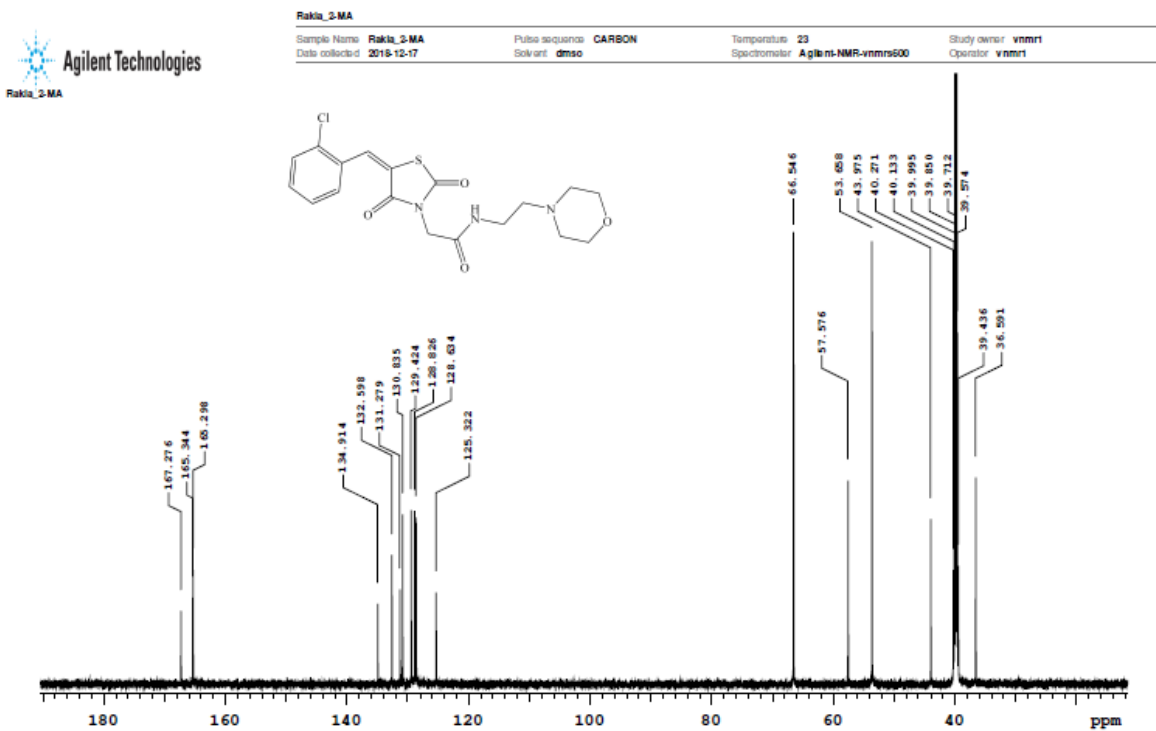

Figure S18  $^1\text{H}$ - and  $^{13}\text{C}$ -NMR for compound **4o**

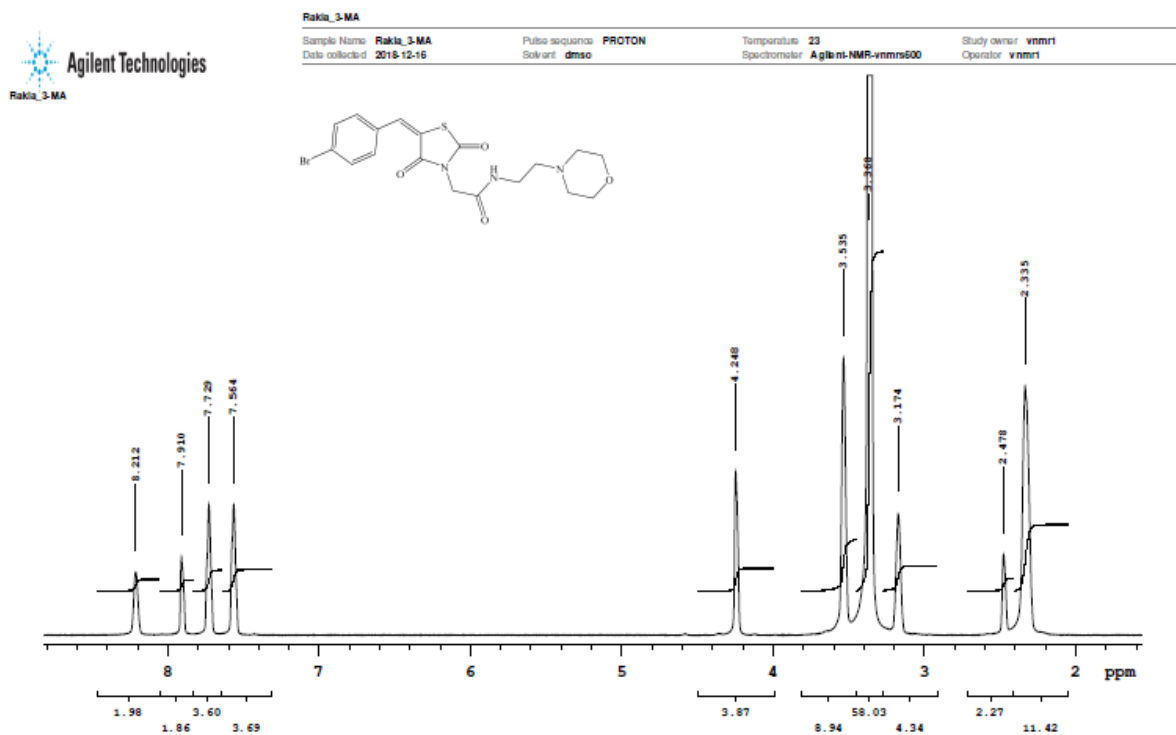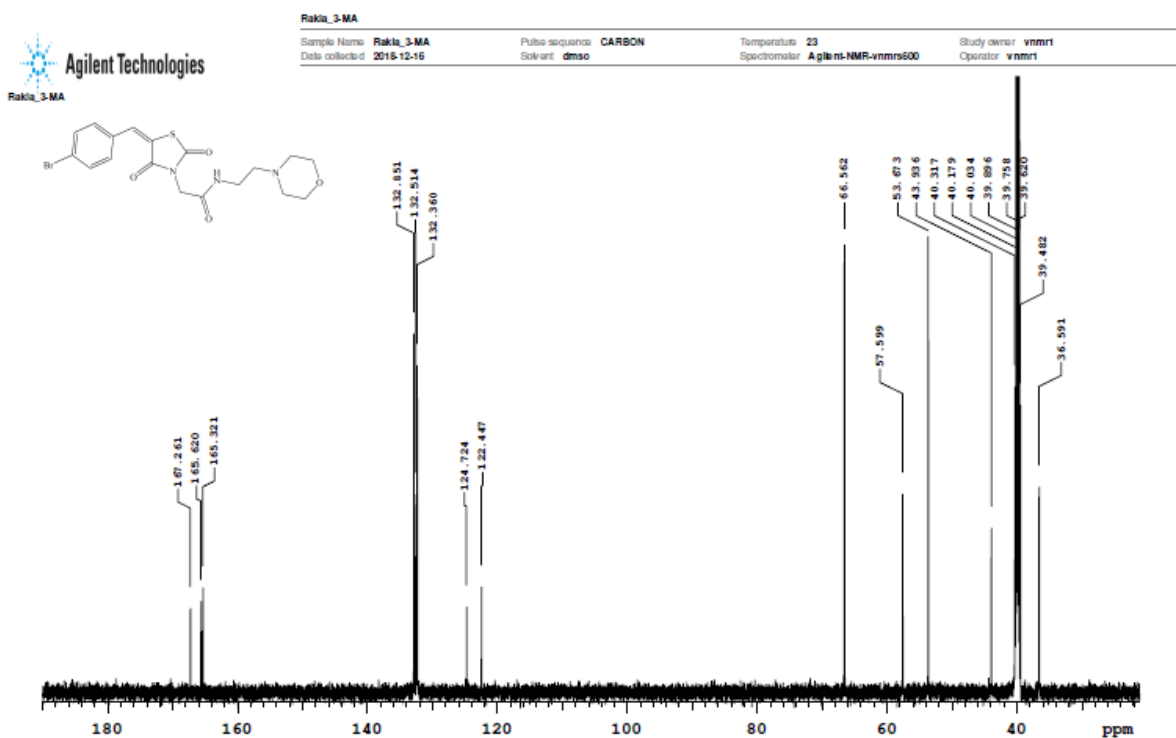

Figure S19  $^1\text{H}$ - and  $^{13}\text{C}$ -NMR for compound 4p

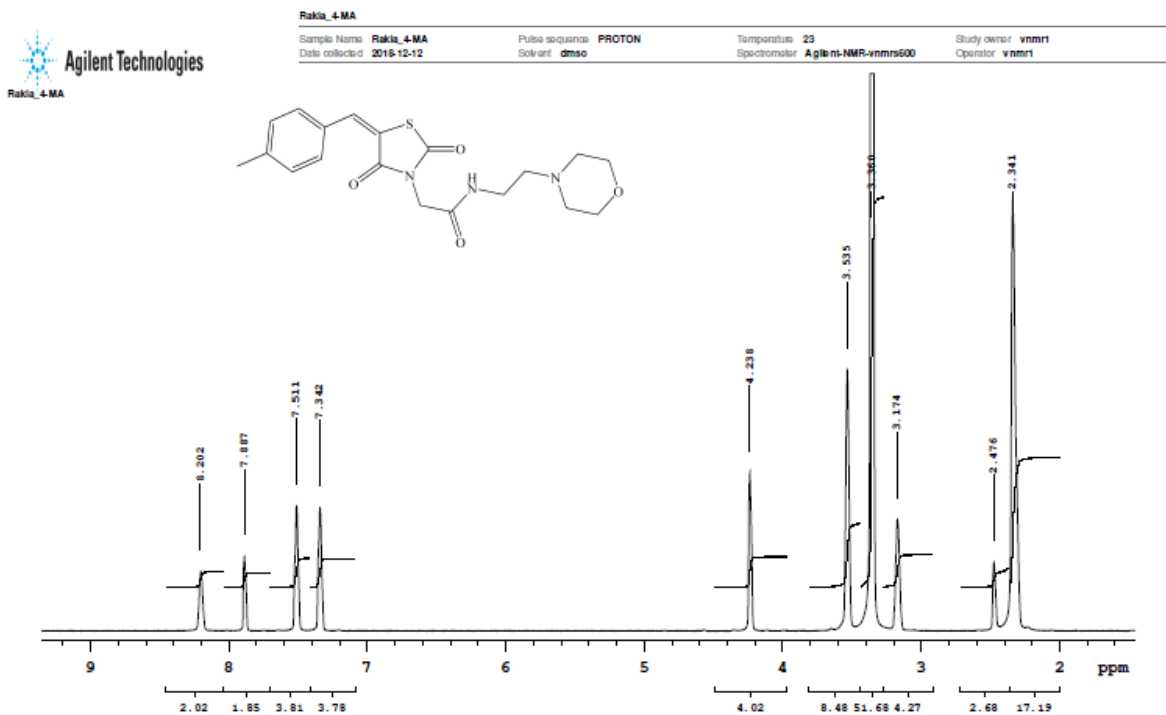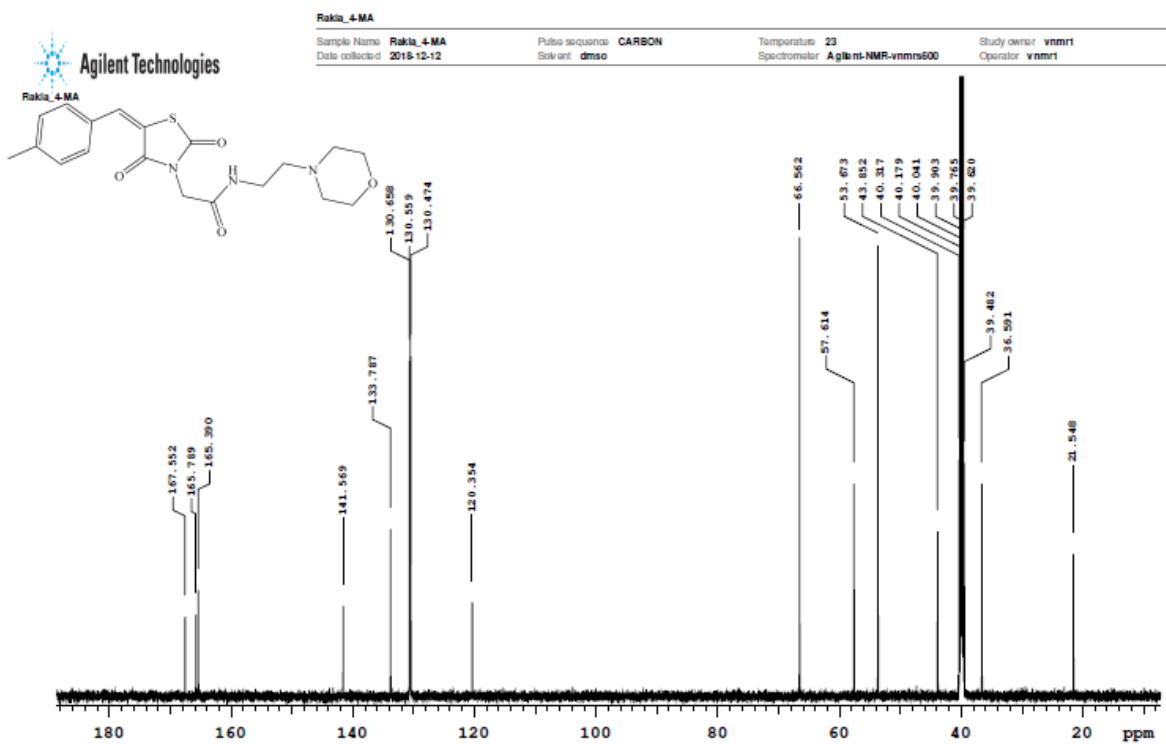

Figure S20  $^1\text{H}$ - and  $^{13}\text{C}$ -NMR for compound 4q

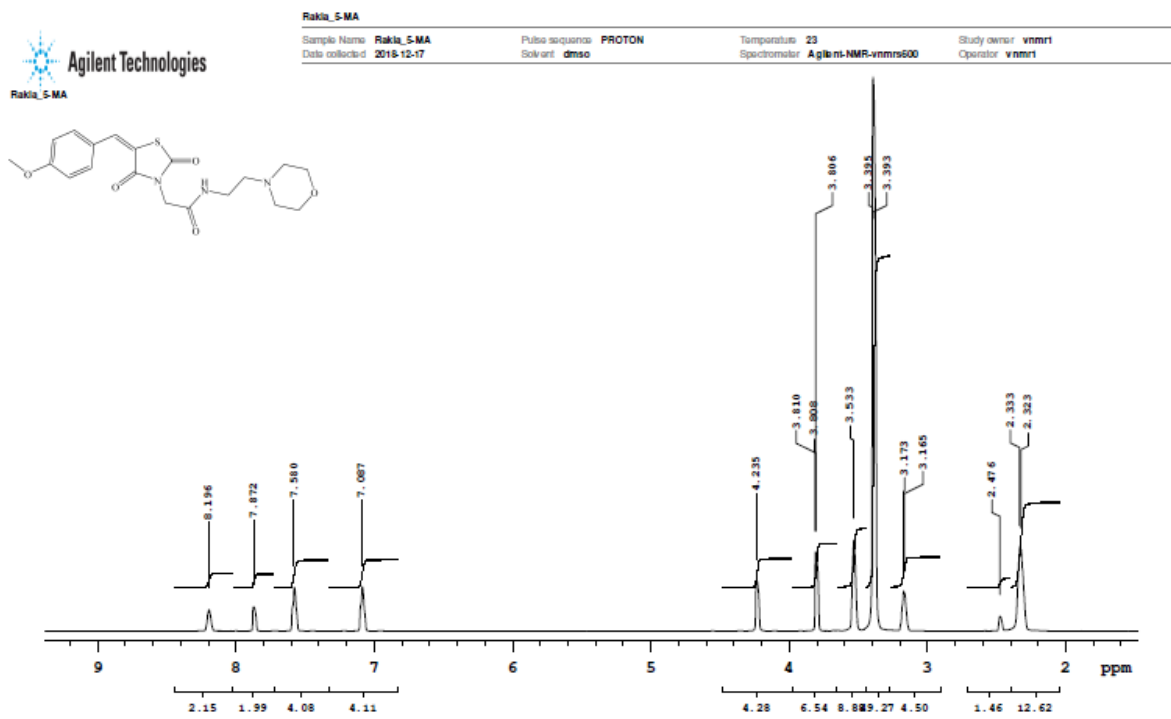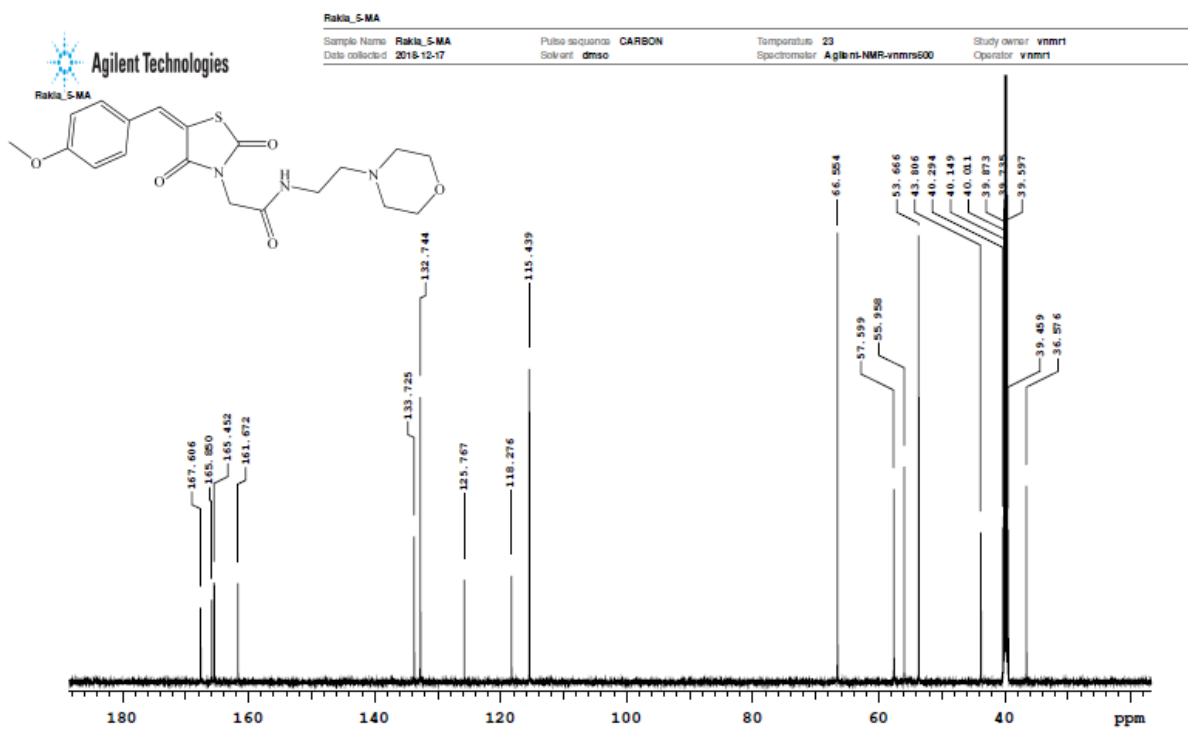

Figure S21  $^1\text{H}$ - and  $^{13}\text{C}$ -NMR for compound 4r

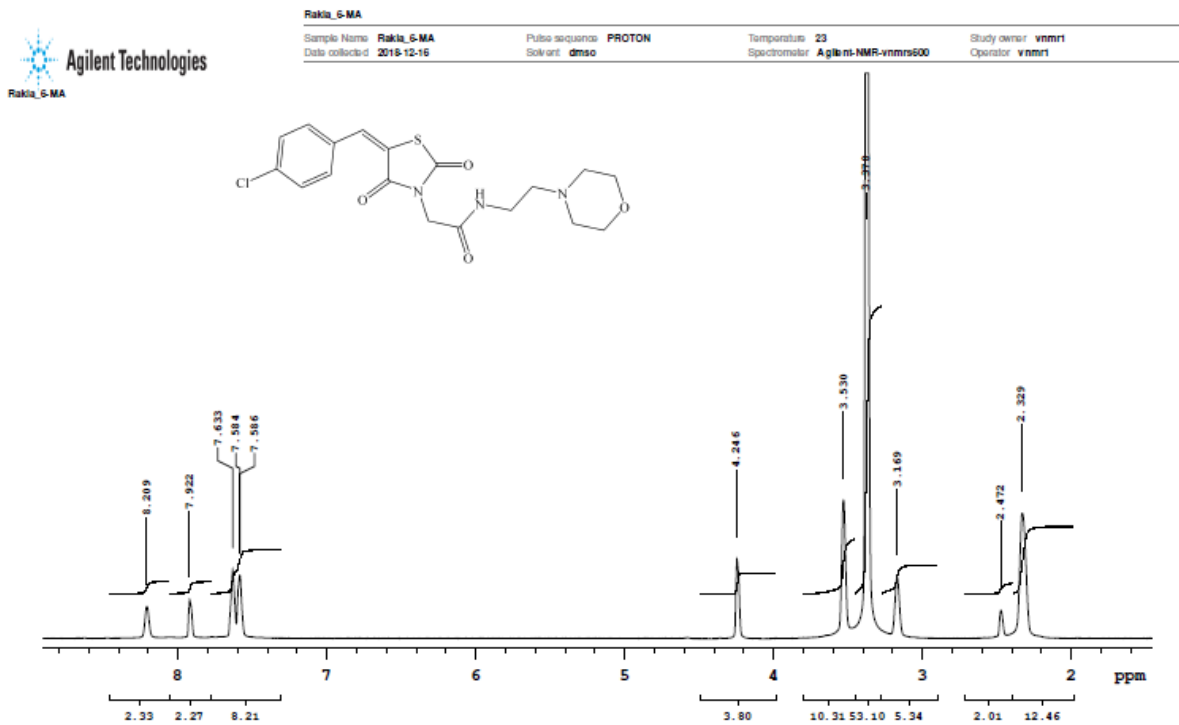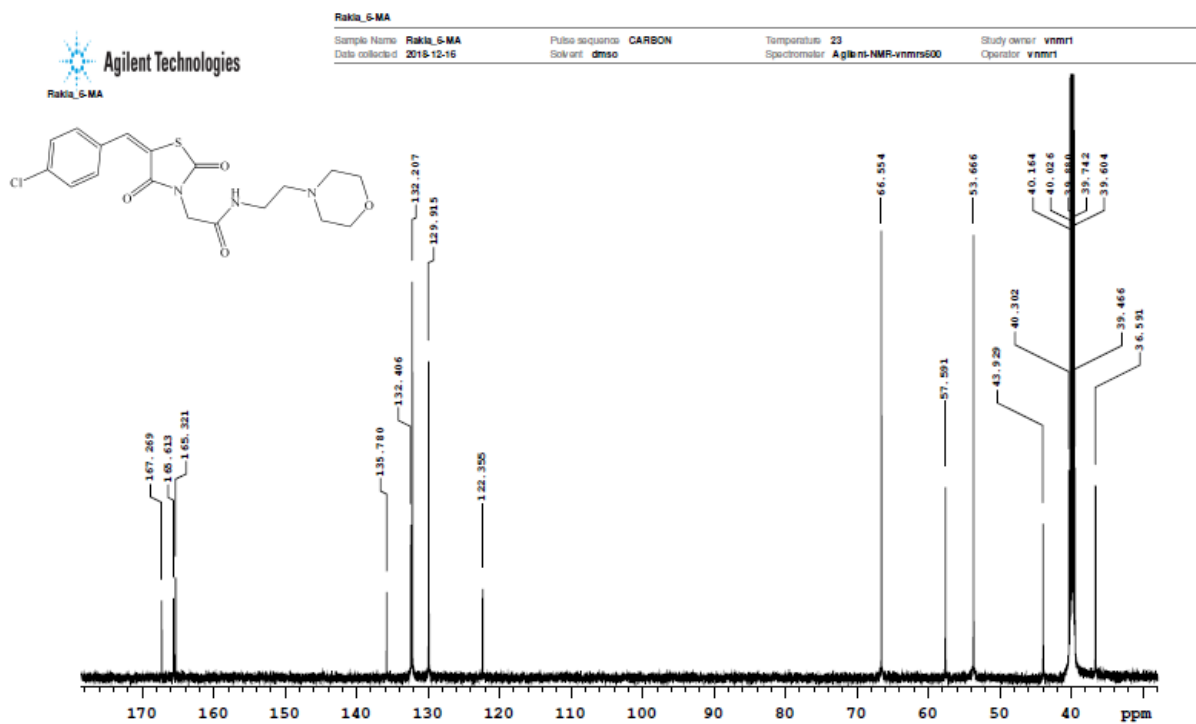

Figure S22  $^1\text{H}$ - and  $^{13}\text{C}$ -NMR for compound 4s

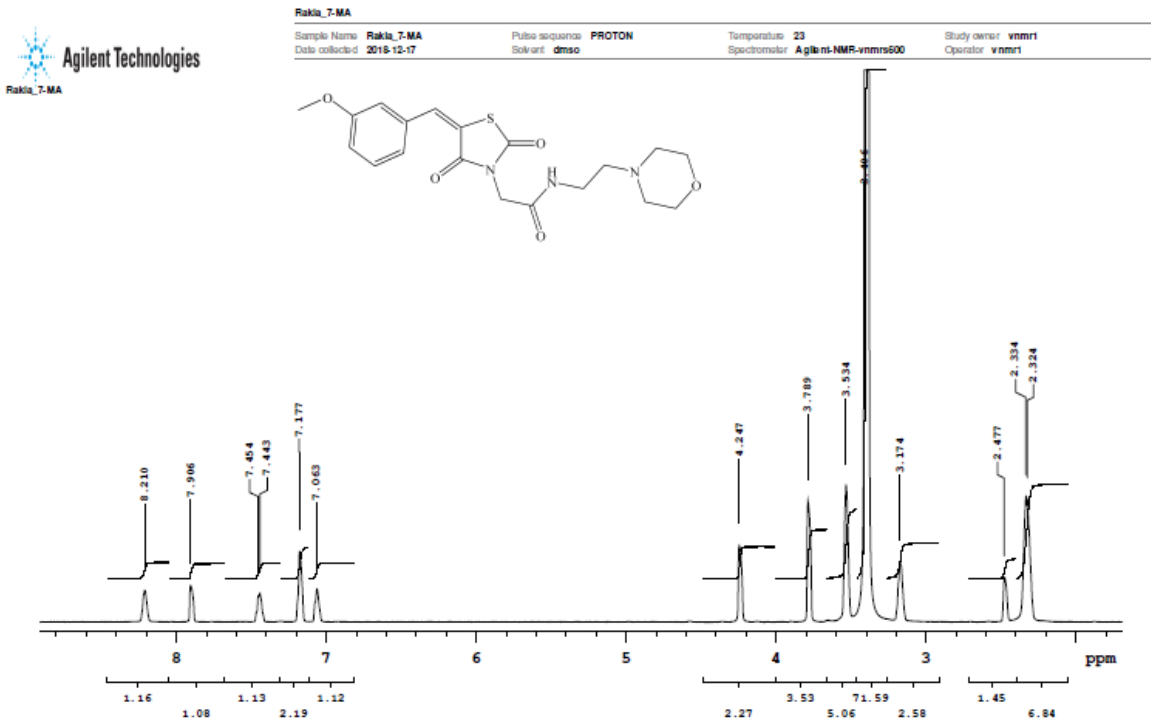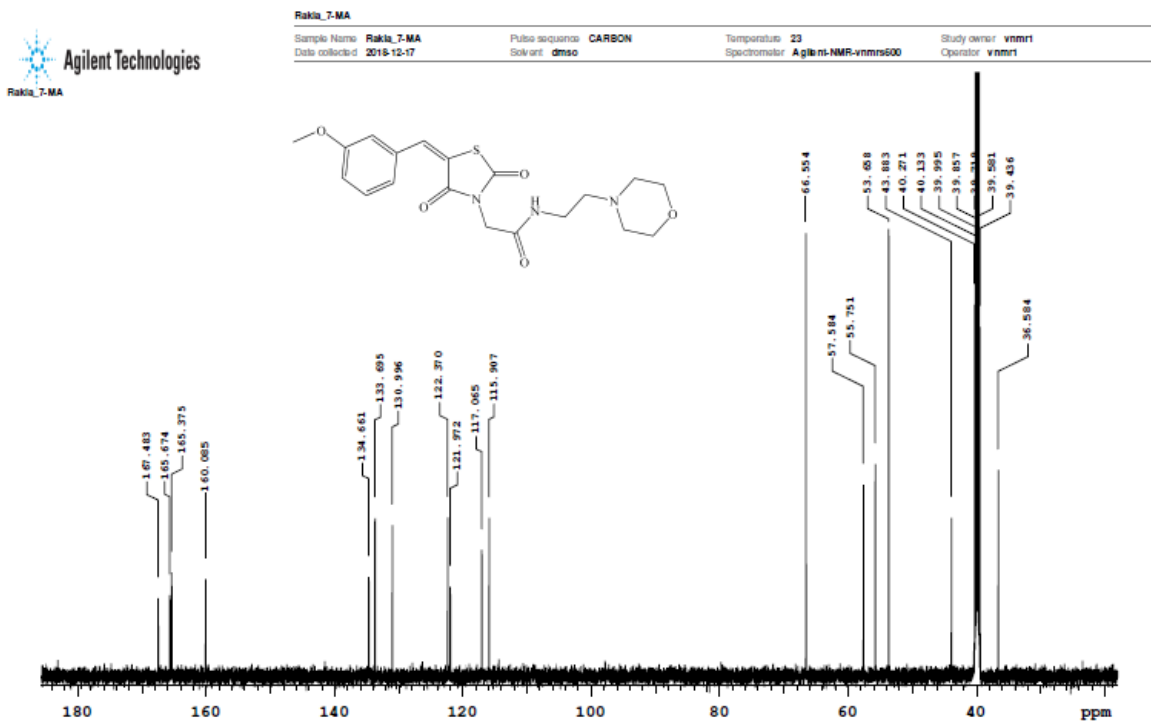



Figure S23  $^1\text{H}$ - and  $^{13}\text{C}$ -NMR for compound 5a

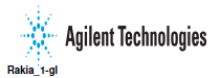

|                   |            |                |        |              |                      |             |       |
|-------------------|------------|----------------|--------|--------------|----------------------|-------------|-------|
| <b>Rakia_1-gl</b> |            | Pulse sequence | PROTON | Temperature  | 23                   | Study owner | vnmr1 |
| Sample Name       | Rakia_1-gl | Solvent        | dms0   | Spectrometer | Agilent-NMR-vnmrs600 | Operator    | vnmr1 |
| Date collected    | 2019-01-13 |                |        |              |                      |             |       |

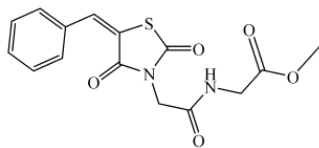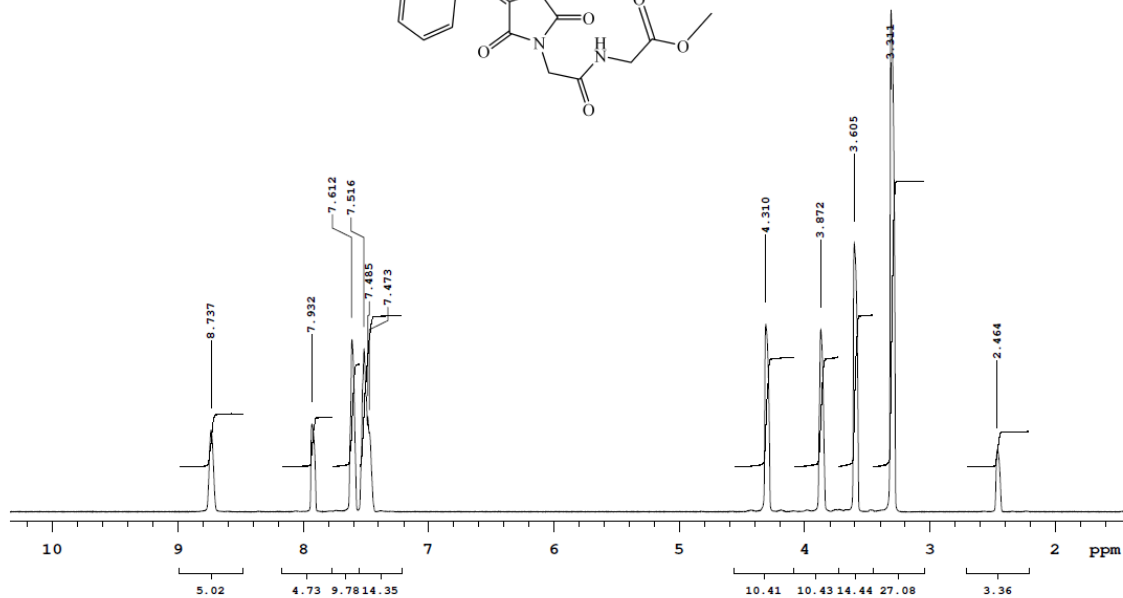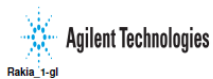

|                   |            |                |        |              |                      |             |       |
|-------------------|------------|----------------|--------|--------------|----------------------|-------------|-------|
| <b>Rakia_1-gl</b> |            | Pulse sequence | CARBON | Temperature  | 23                   | Study owner | vnmr1 |
| Sample Name       | Rakia_1-gl | Solvent        | dms0   | Spectrometer | Agilent-NMR-vnmrs600 | Operator    | vnmr1 |
| Date collected    | 2019-01-13 |                |        |              |                      |             |       |

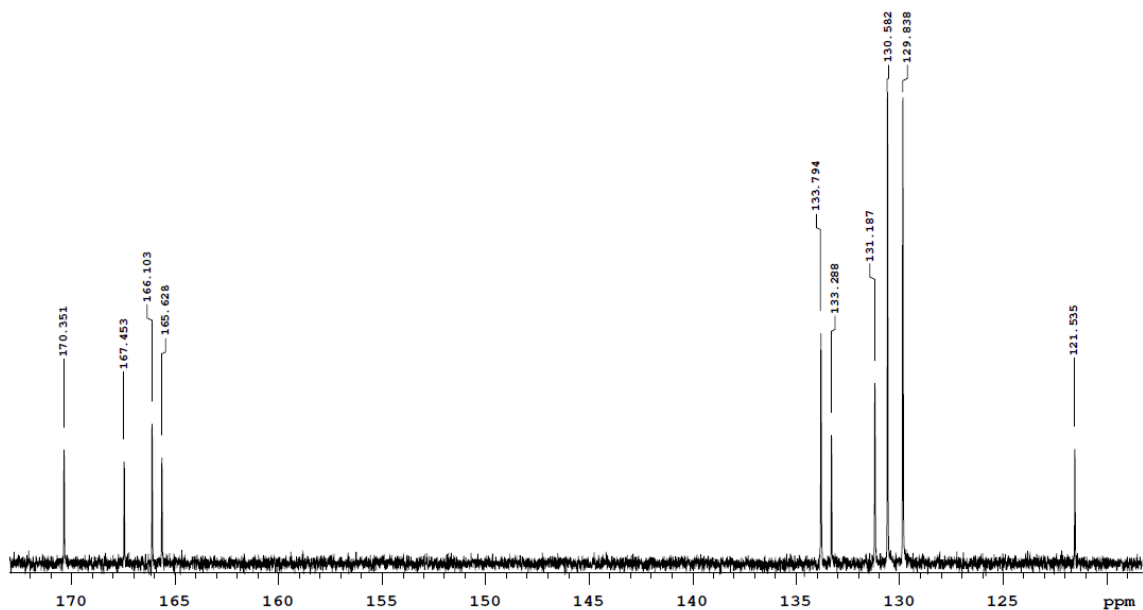

Figure S24  $^1\text{H}$ - and  $^{13}\text{C}$ -NMR for compound 5b

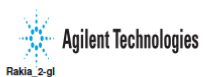

Rakia\_2-gl  
 Sample Name Rakia\_2-gl Pulse sequence PROTON Temperature 23 Study owner vnmr1  
 Date collected 2019-01-13 Solvent dms0 Spectrometer Agilent-NMR-vnmr600 Operator vnmr1

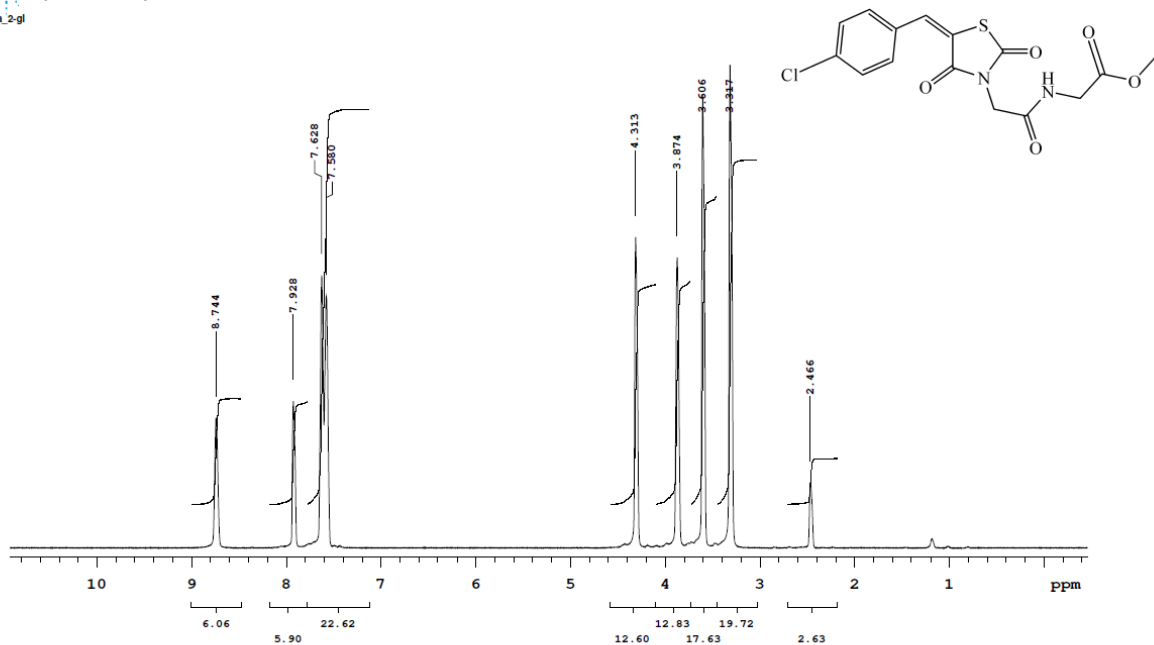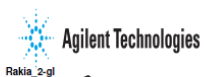

Rakia\_2-gl  
 Sample Name Rakia\_2-gl Pulse sequence CARBON Temperature 23 Study owner vnmr1  
 Date collected 2019-01-13 Solvent dms0 Spectrometer Agilent-NMR-vnmr600 Operator vnmr1

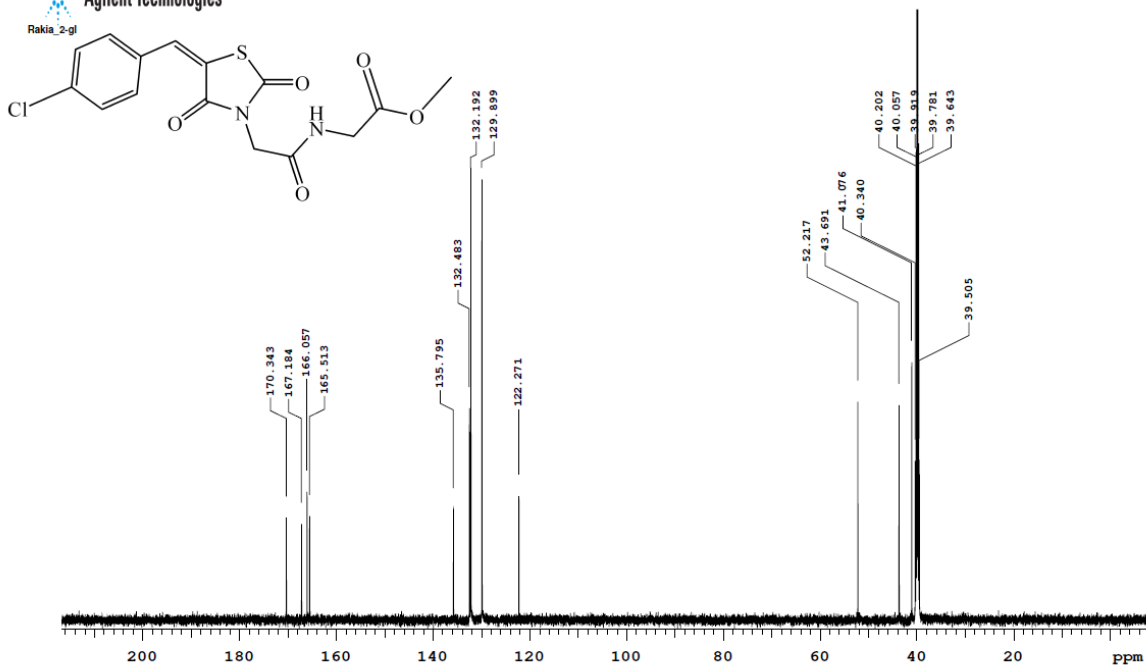

Figure S25  $^1\text{H}$ - and  $^{13}\text{C}$ -NMR for compound 5c

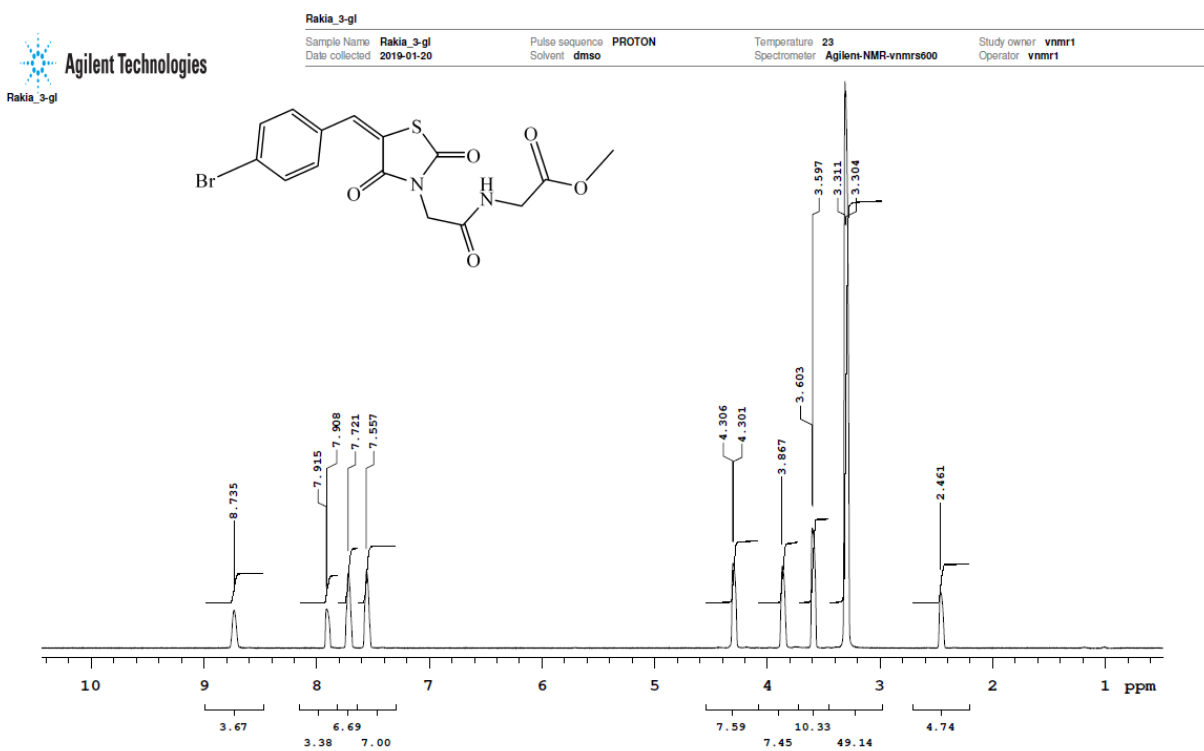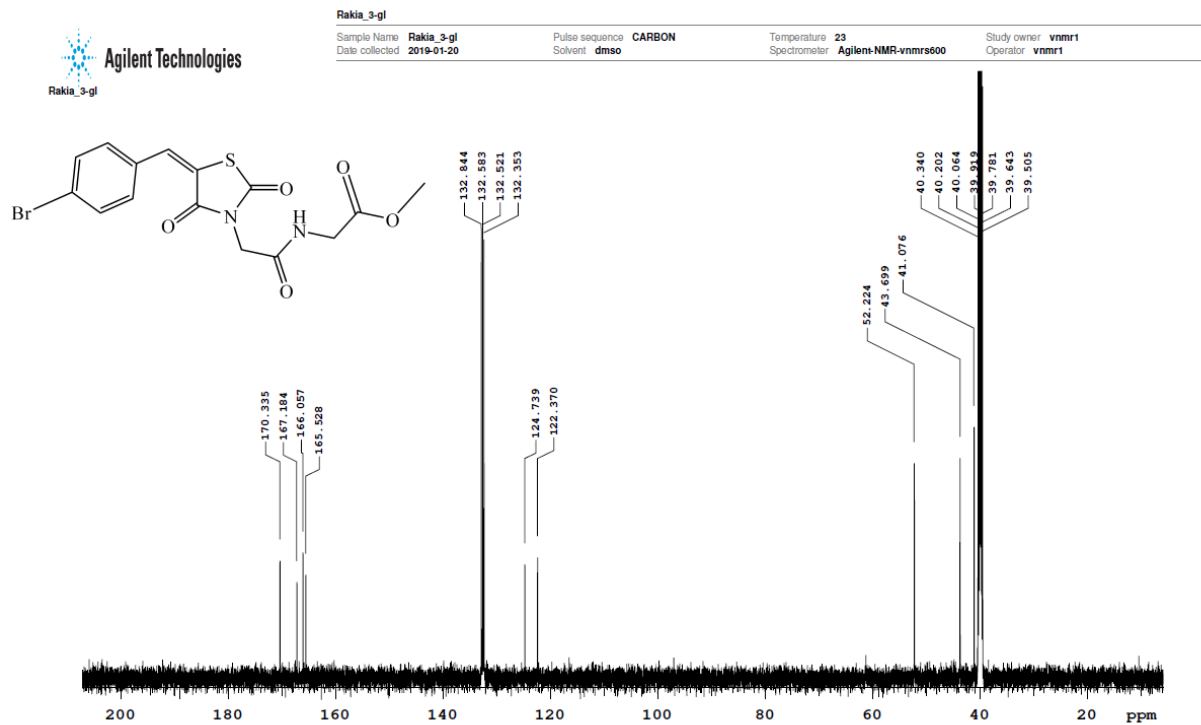

Figure S26  $^1\text{H}$ - and  $^{13}\text{C}$ -NMR for compound 5d

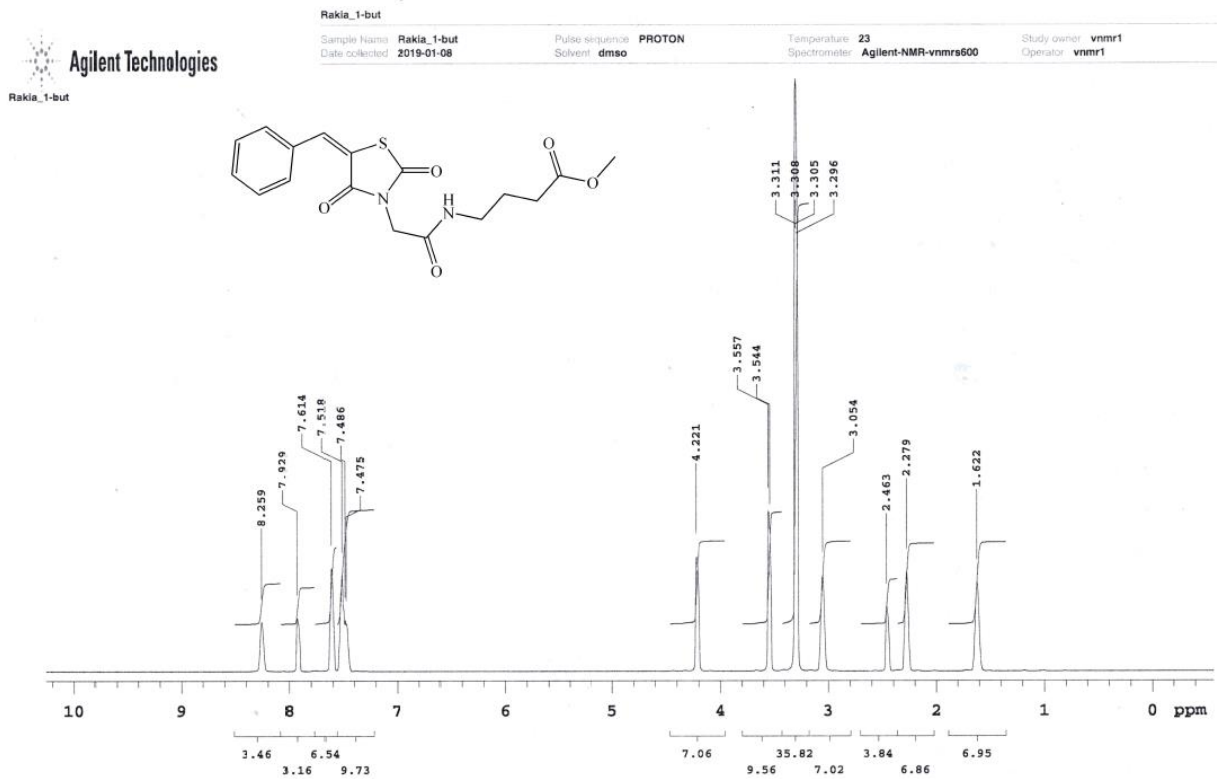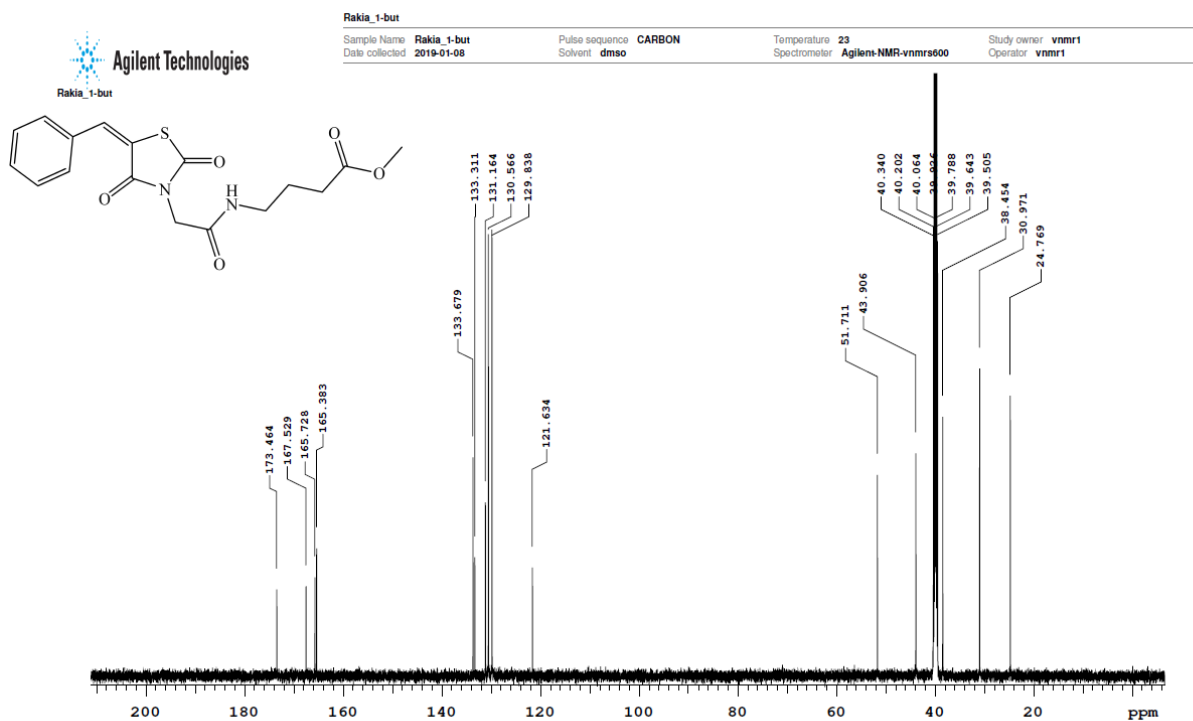

Figure S27  $^1\text{H}$ - and  $^{13}\text{C}$ -NMR for compound 5e

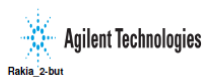

| Rakia_2-but |             | Pulse sequence | PROTON | Temperature  | 23                  | Study owner | vnmr1 |
|-------------|-------------|----------------|--------|--------------|---------------------|-------------|-------|
| Sample Name | Rakia_2-but | Solvent        | dms    | Spectrometer | Agilent-NMR-vnmr600 | Operator    | vnmr1 |

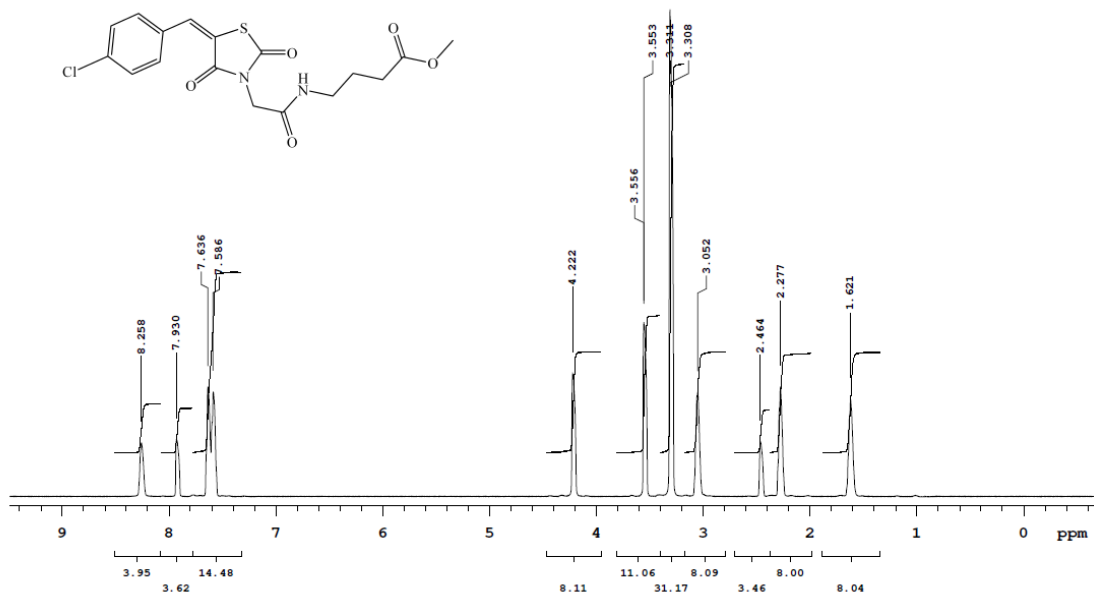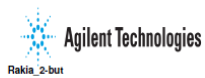

| Rakia_2-but |             | Pulse sequence | PROTON | Temperature  | 23                  | Study owner | vnmr1 |
|-------------|-------------|----------------|--------|--------------|---------------------|-------------|-------|
| Sample Name | Rakia_2-but | Solvent        | dms    | Spectrometer | Agilent-NMR-vnmr600 | Operator    | vnmr1 |

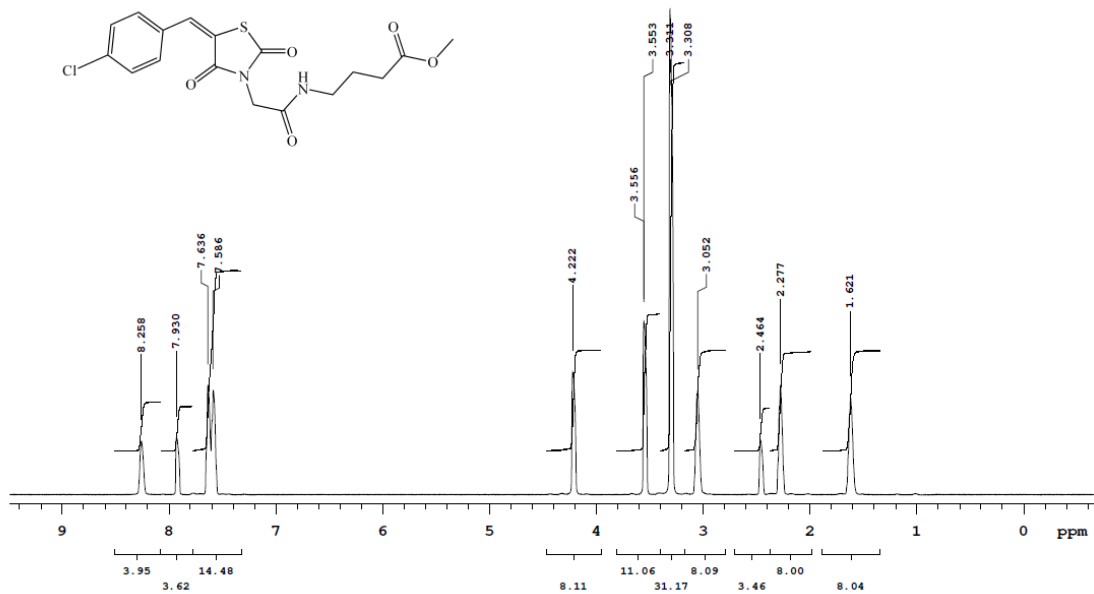

Figure S28  $^1\text{H}$ - and  $^{13}\text{C}$ -NMR for compound 5f

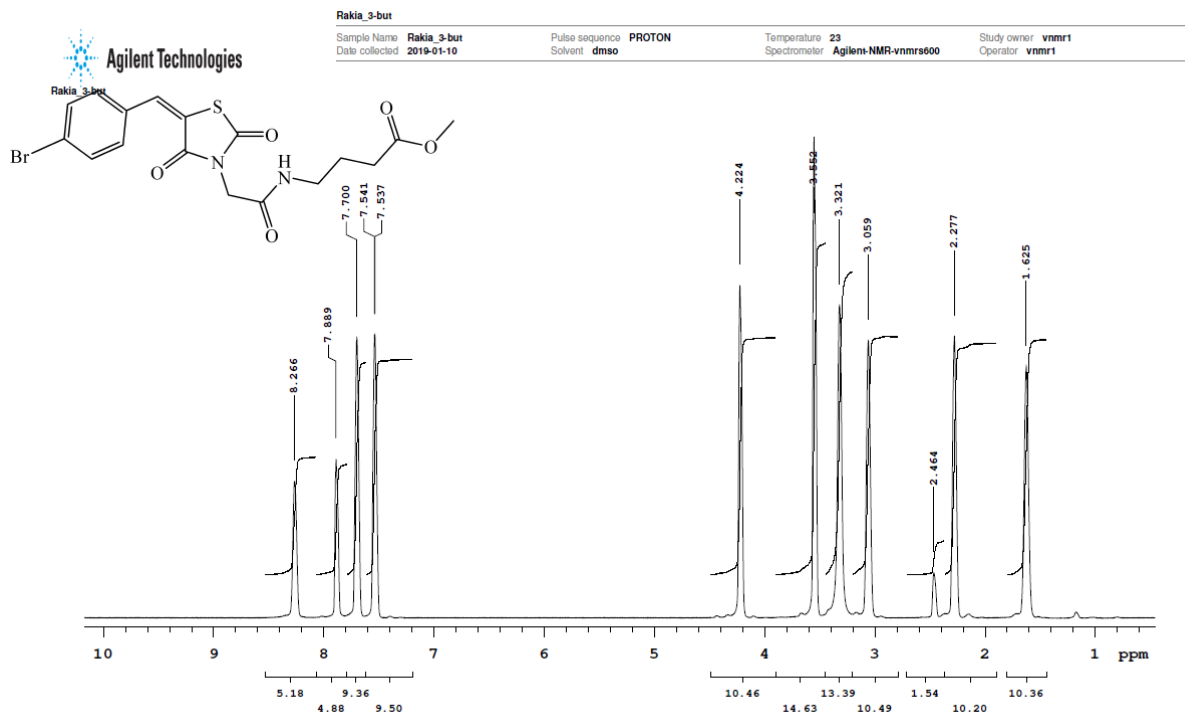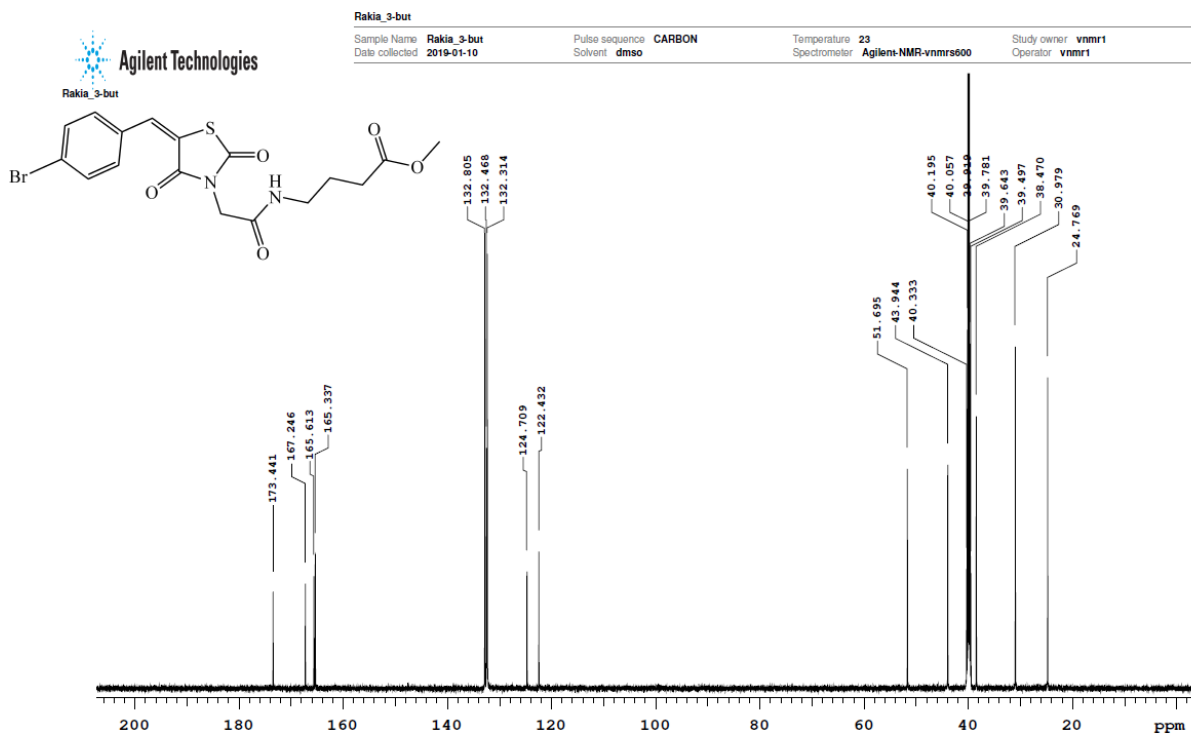

Figure S29  $^1\text{H}$ - and  $^{13}\text{C}$ -NMR for compound 5g

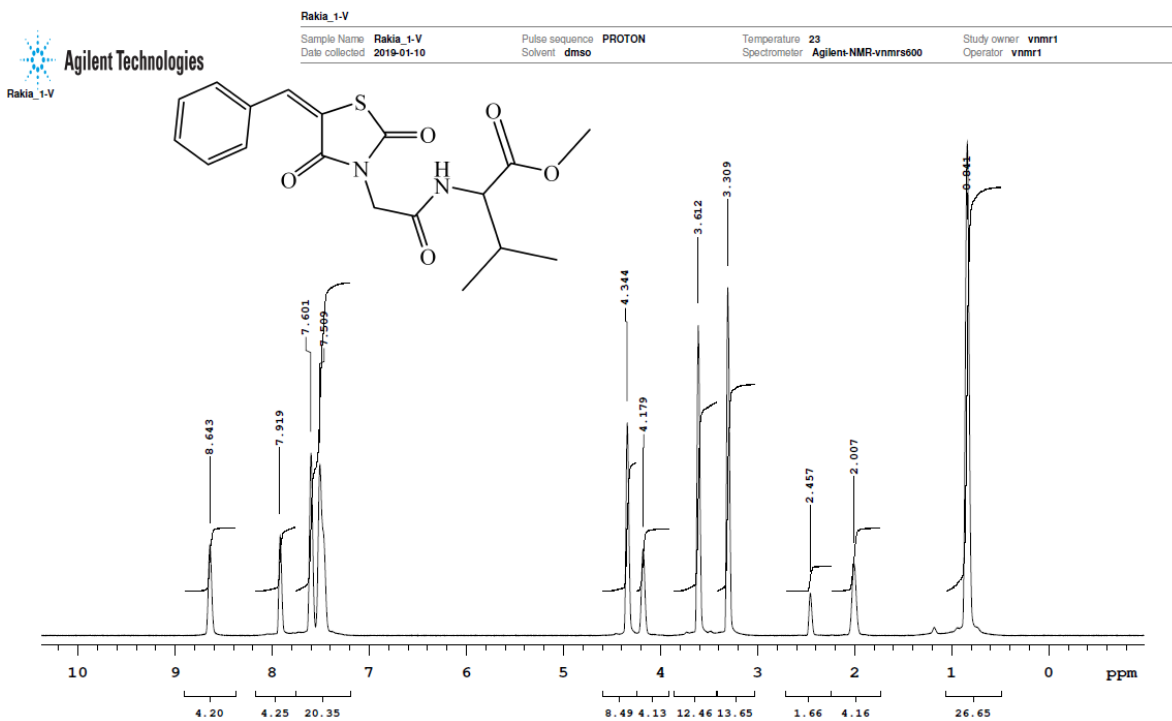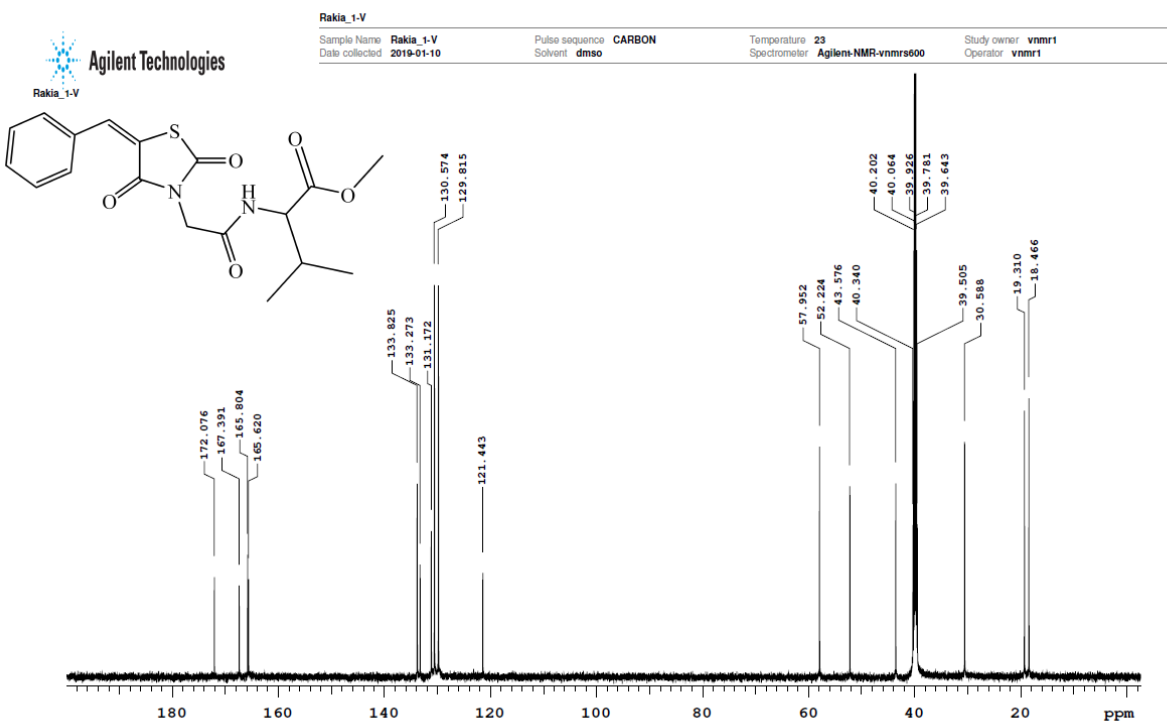

Figure S30  $^1\text{H}$ - and  $^{13}\text{C}$ -NMR for compound 5h

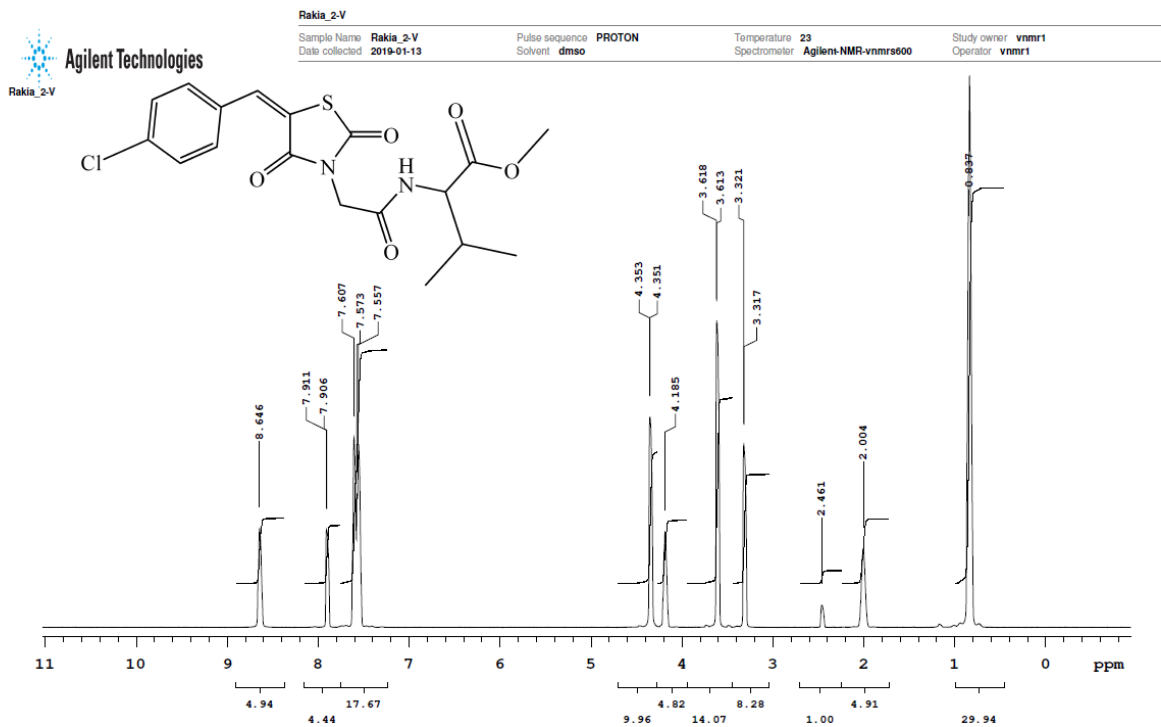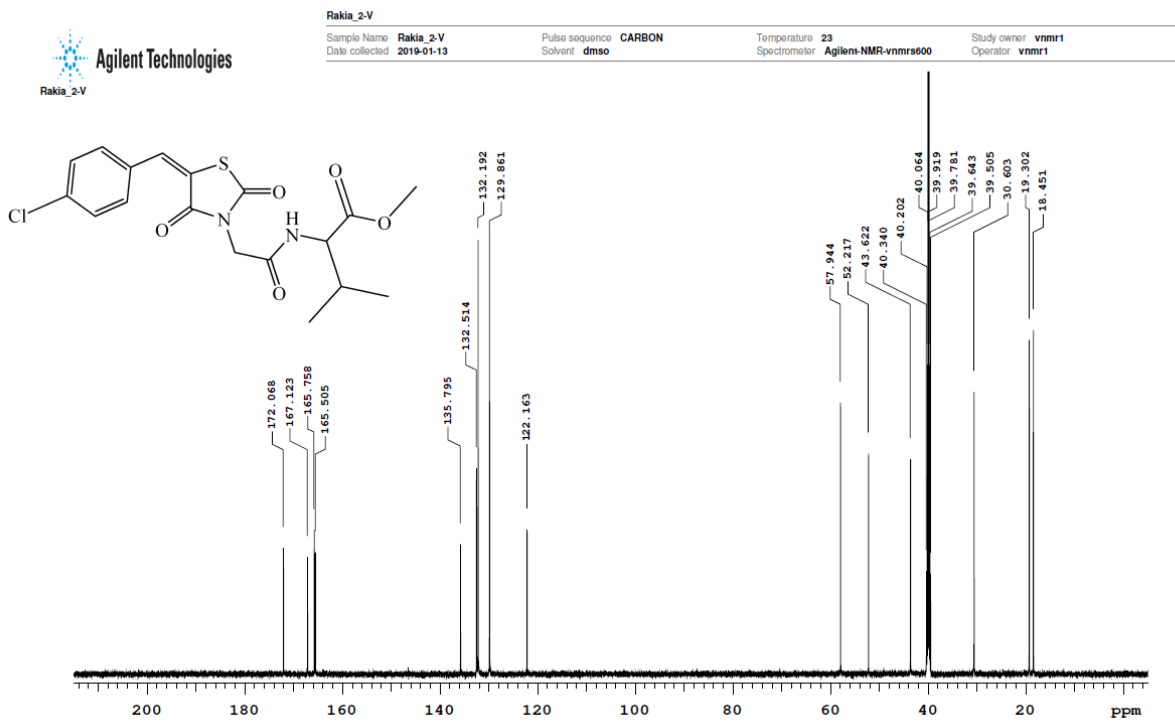



Figure S31  $^1\text{H}$ - and  $^{13}\text{C}$ -NMR for compound 5i

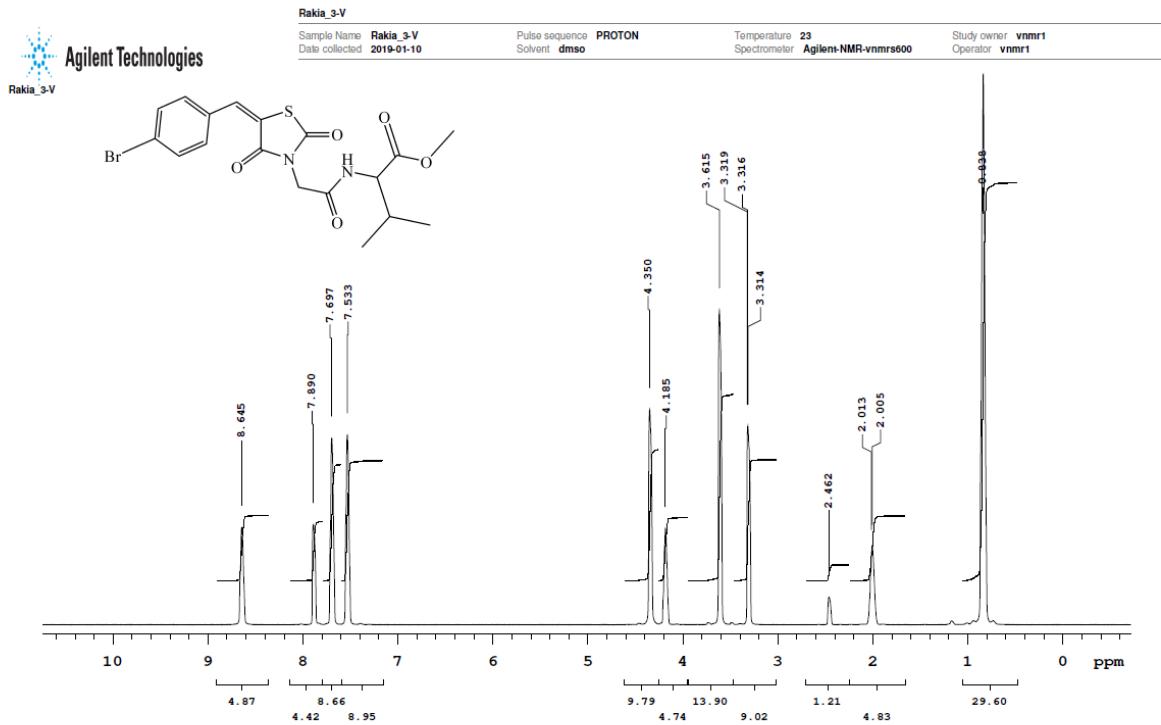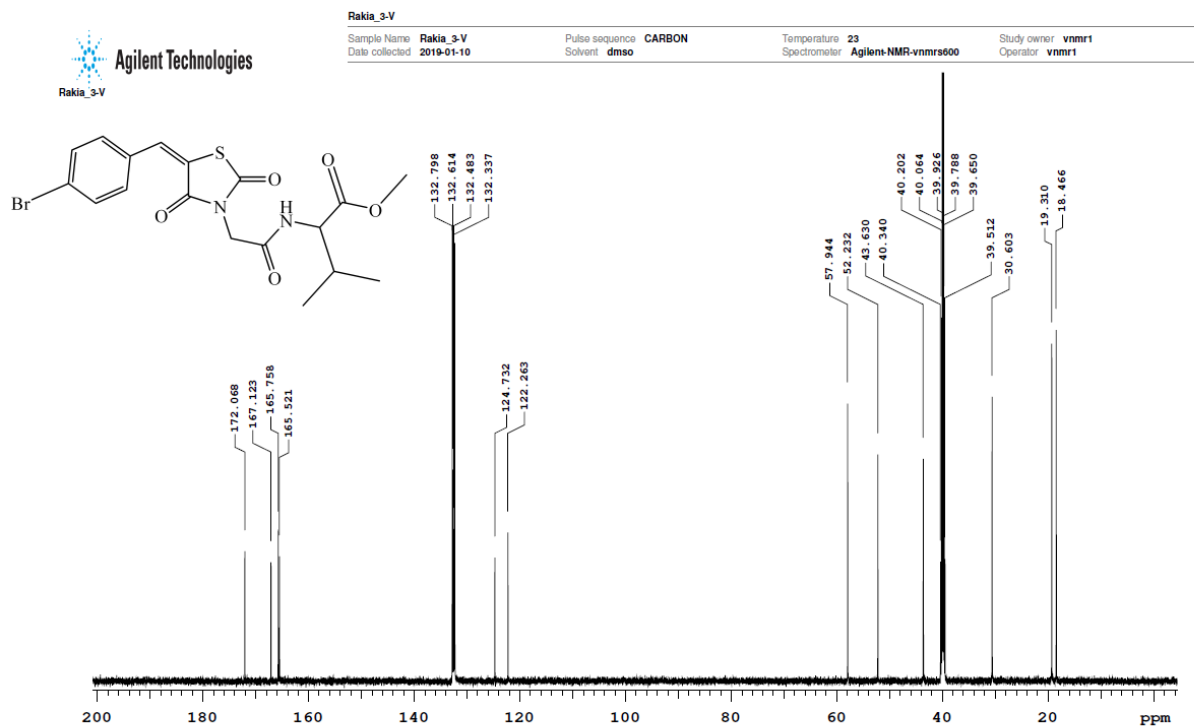

Figure S32  $^1\text{H}$ - and  $^{13}\text{C}$ -NMR for compound 5j

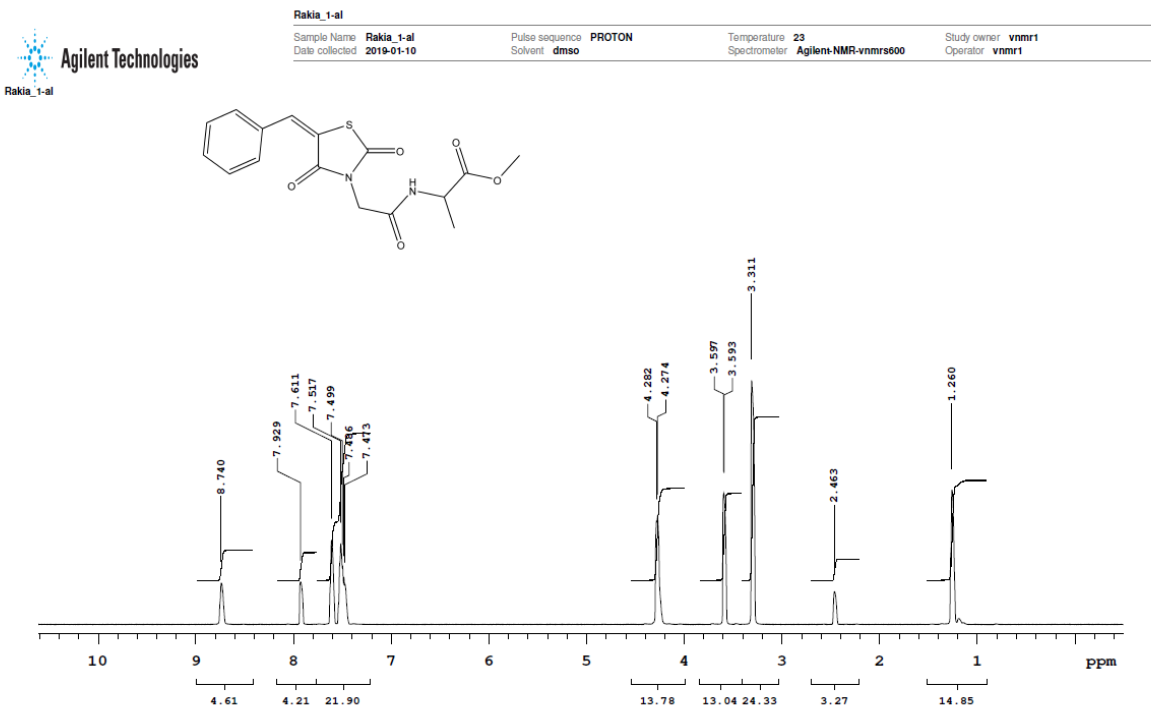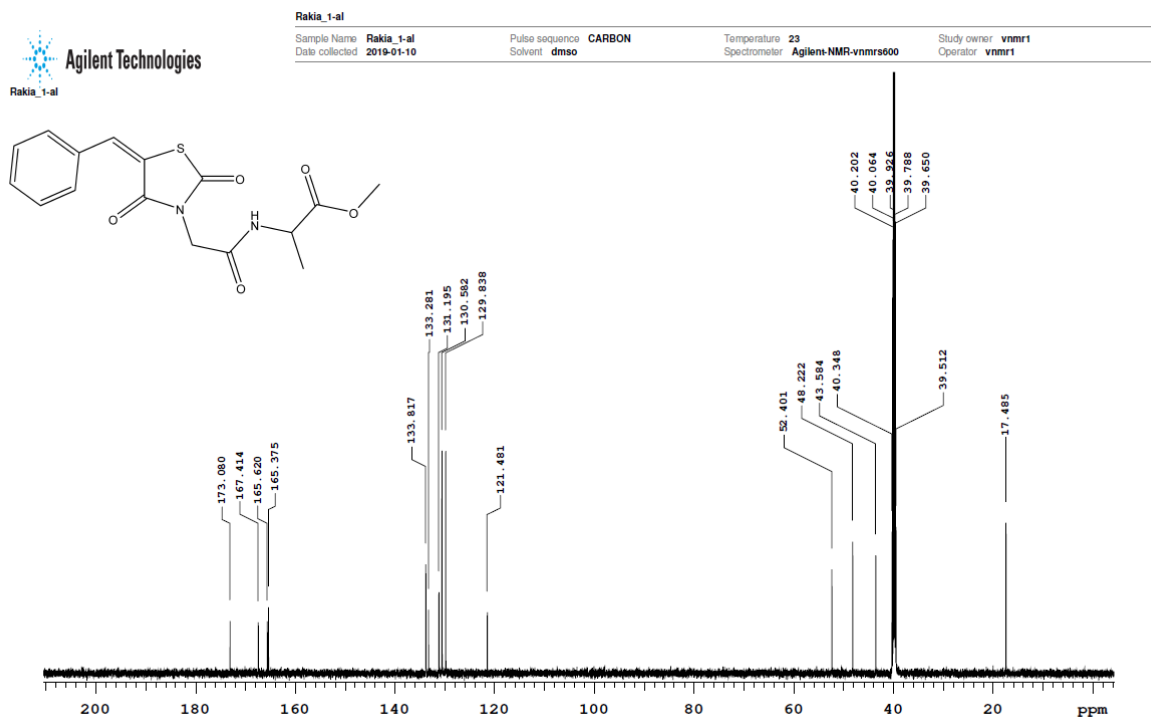

Figure S33  $^1\text{H}$ - and  $^{13}\text{C}$ -NMR for compound 5k

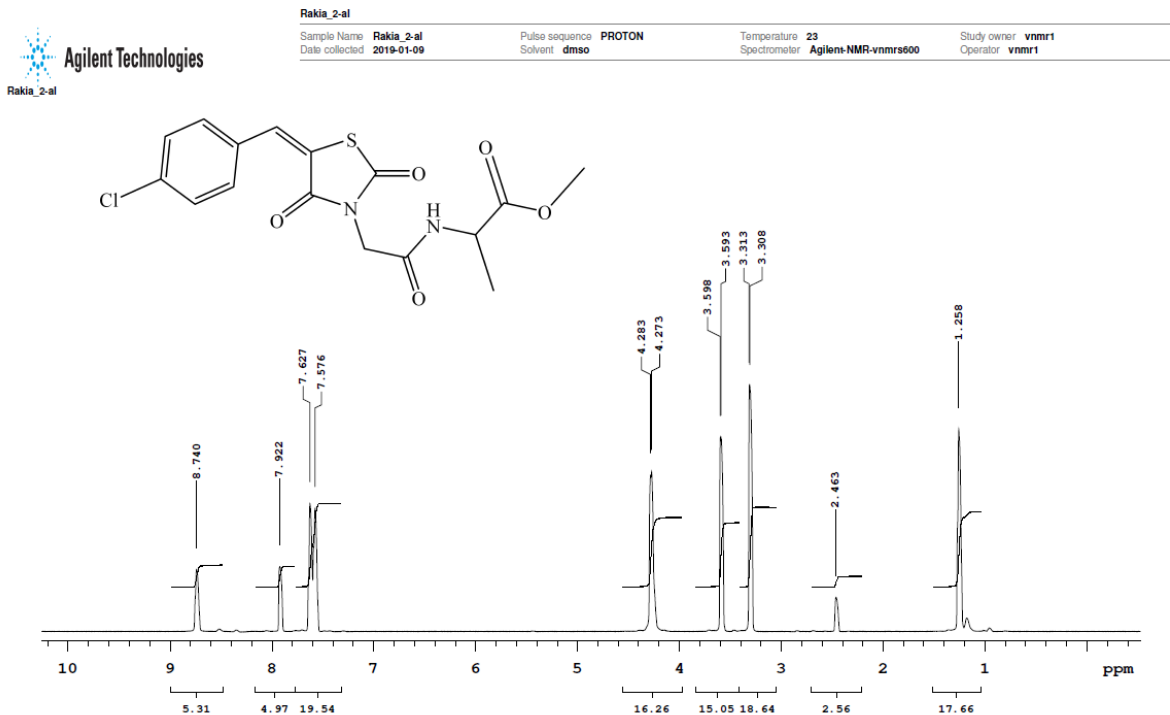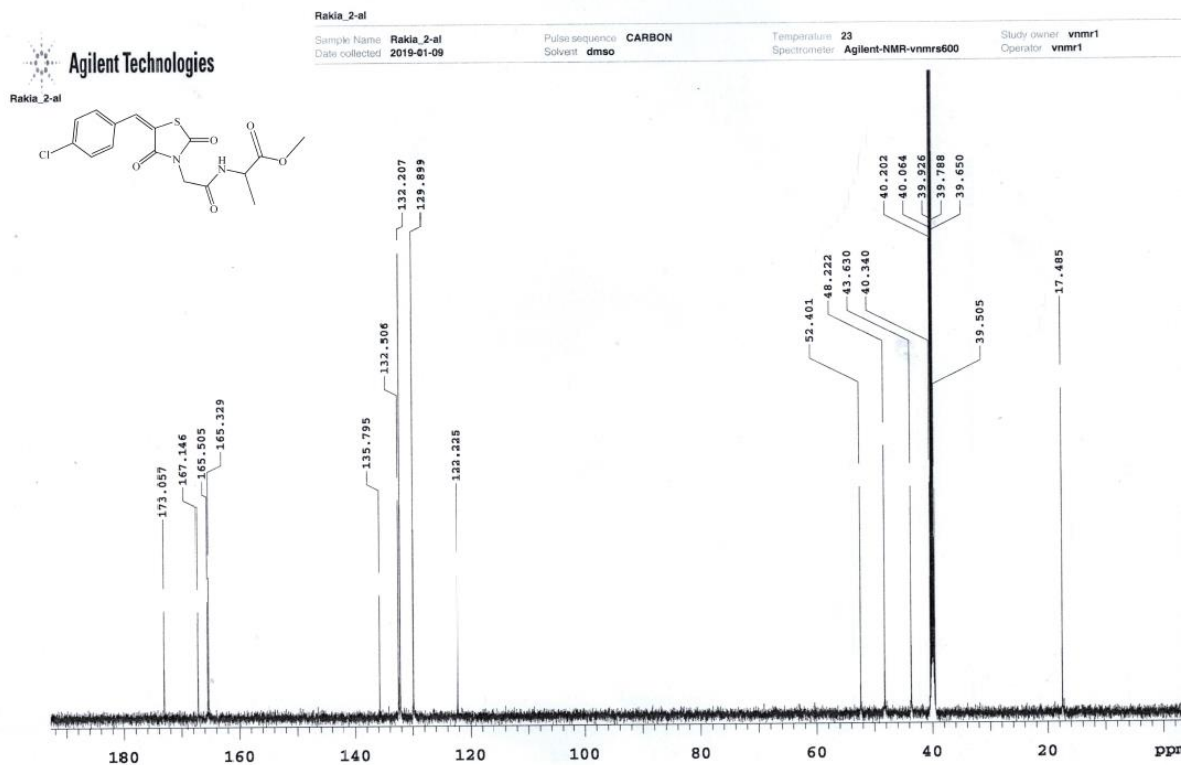

Figure S34  $^1\text{H}$ - and  $^{13}\text{C}$ -NMR for compound 51

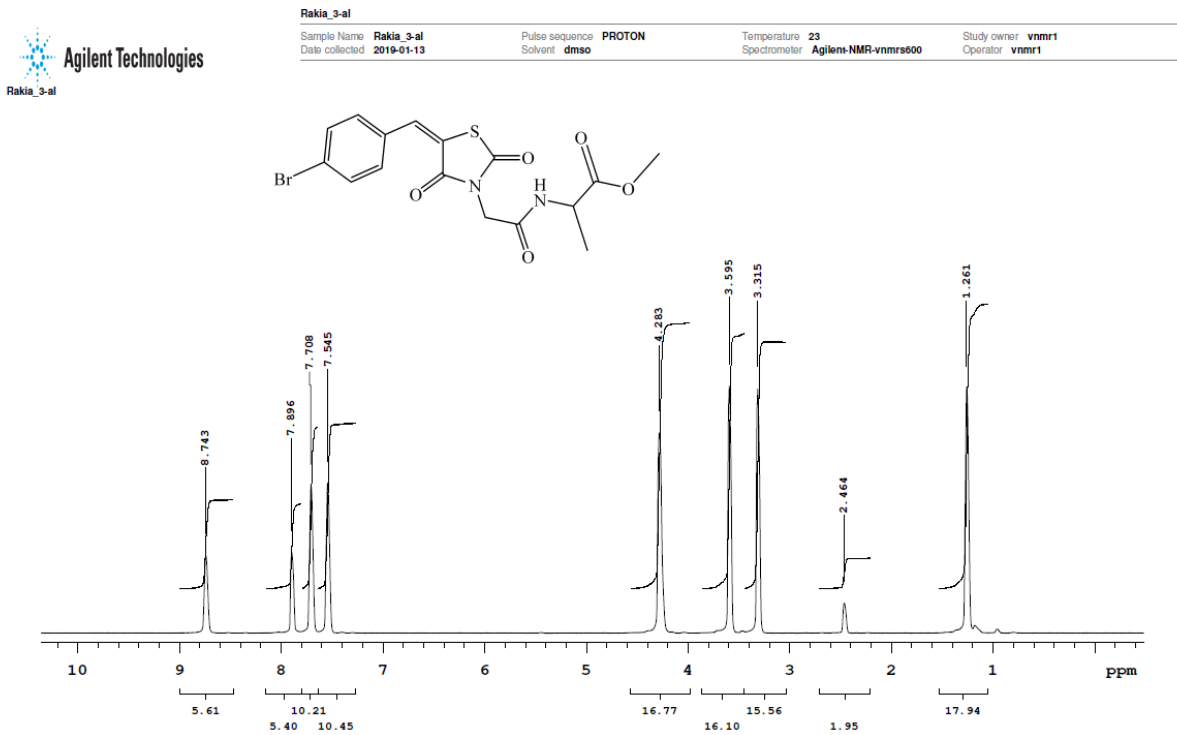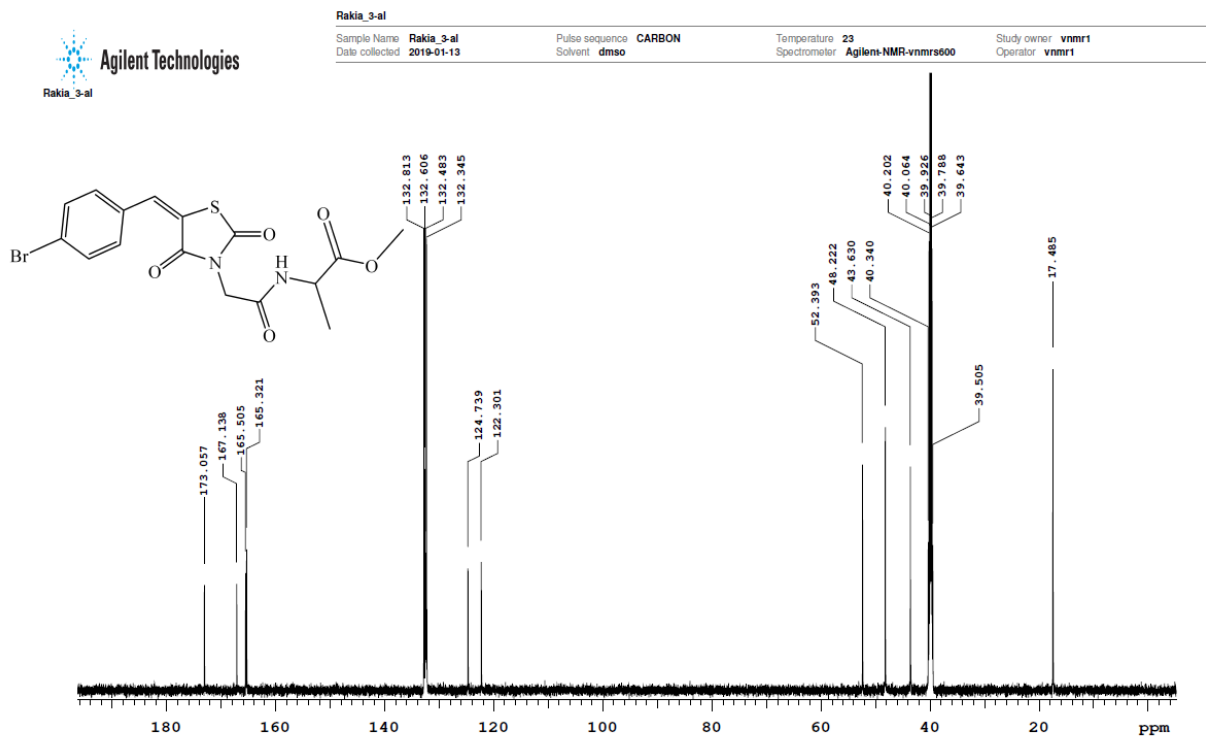

Figure S35  $^1\text{H}$ - and  $^{13}\text{C}$ -NMR for compound 5m

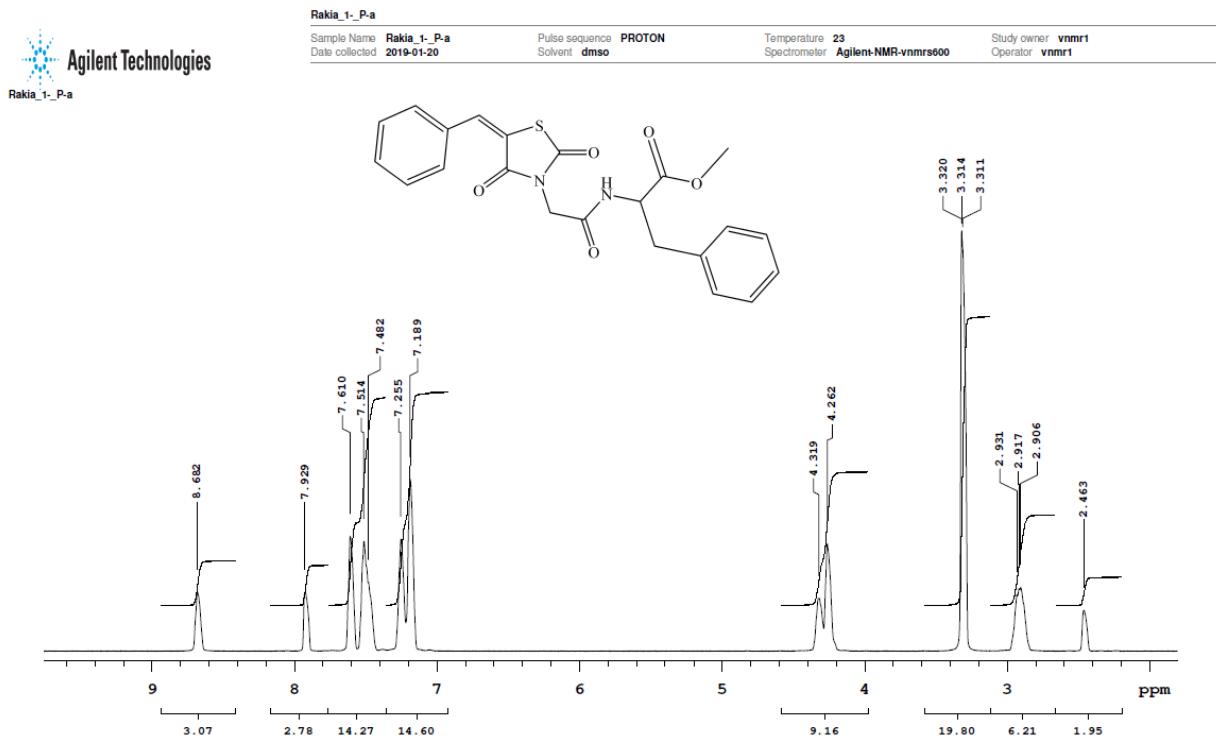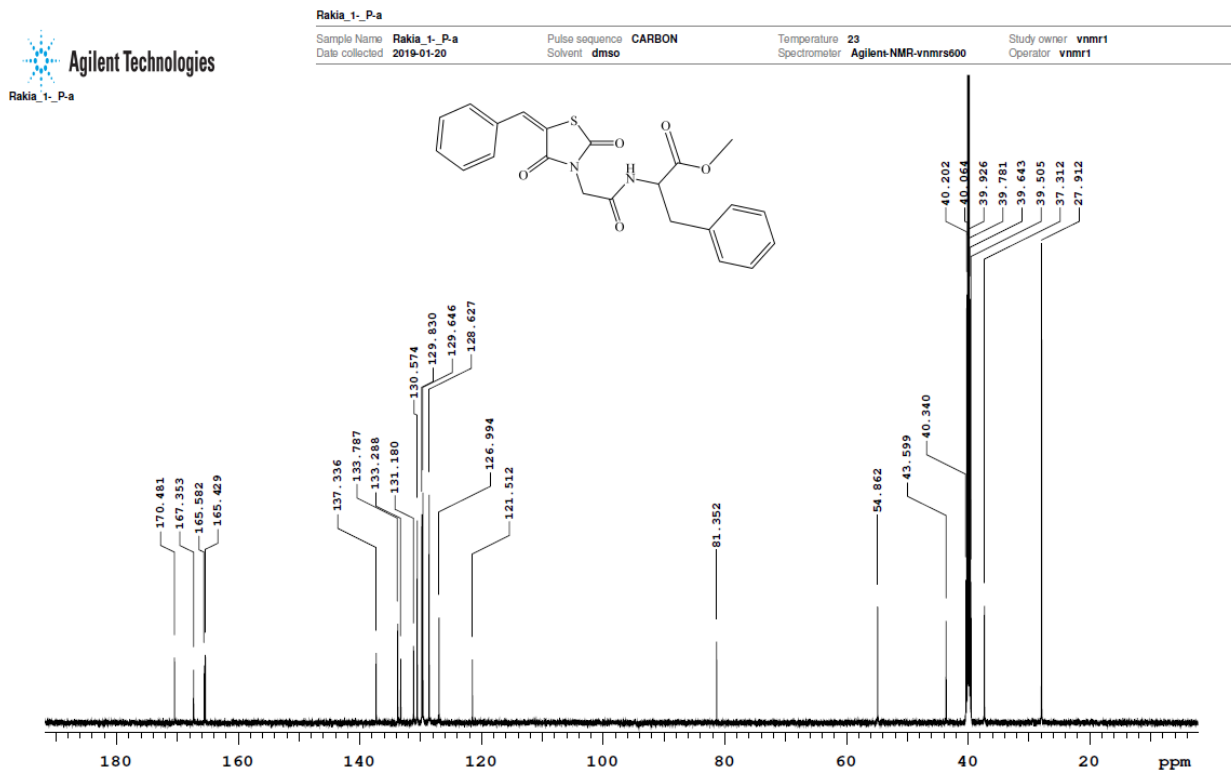

Figure S36  $^1\text{H}$ - and  $^{13}\text{C}$ -NMR for compound 5n

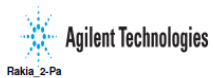

Rakia\_2-Pa  
 Sample Name Rakia\_2-Pa Pulse sequence PROTON Temperature 23 Study owner vnmr1  
 Date collected 2019-01-09 Solvent dmsc Spectrometer Agilent-NMR-vnmr600 Operator vnmr1

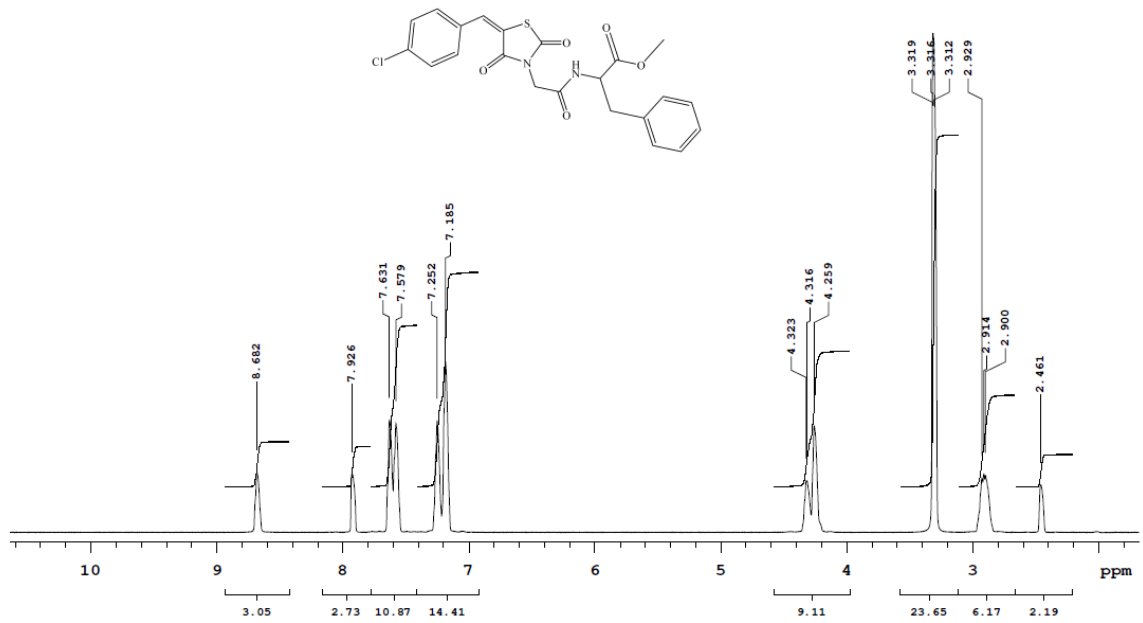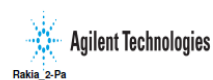

Rakia\_2-Pa  
 Sample Name Rakia\_2-Pa Pulse sequence CARBON Temperature 23 Study owner vnmr1  
 Date collected 2019-01-09 Solvent dmsc Spectrometer Agilent-NMR-vnmr600 Operator vnmr1

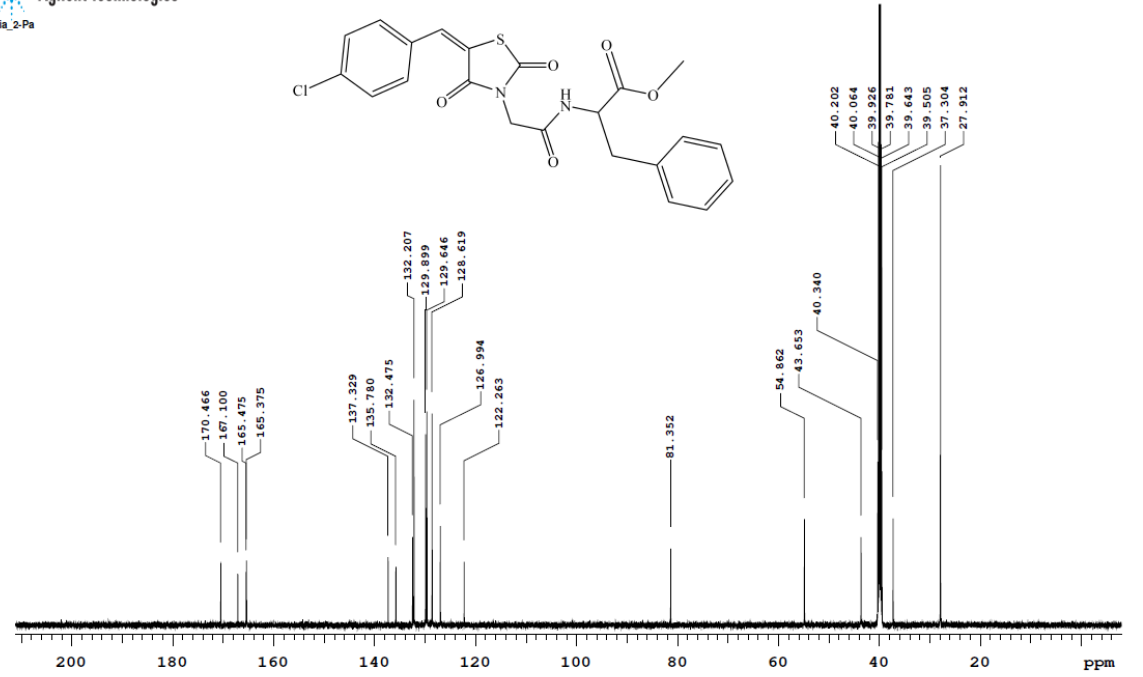

Figure S37  $^1\text{H}$ - and  $^{13}\text{C}$ -NMR for compound 5o

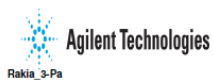

Rakia\_3-Pa  
 Sample Name Rakia\_3-Pa Pulse sequence PROTON Temperature 23  
 Date collected 2019-01-09 Solvent dms0 Spectrometer Agilent-NMR-vnmr500 Study owner vnmr1  
 Operator vnmr1

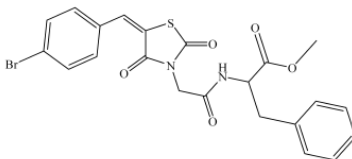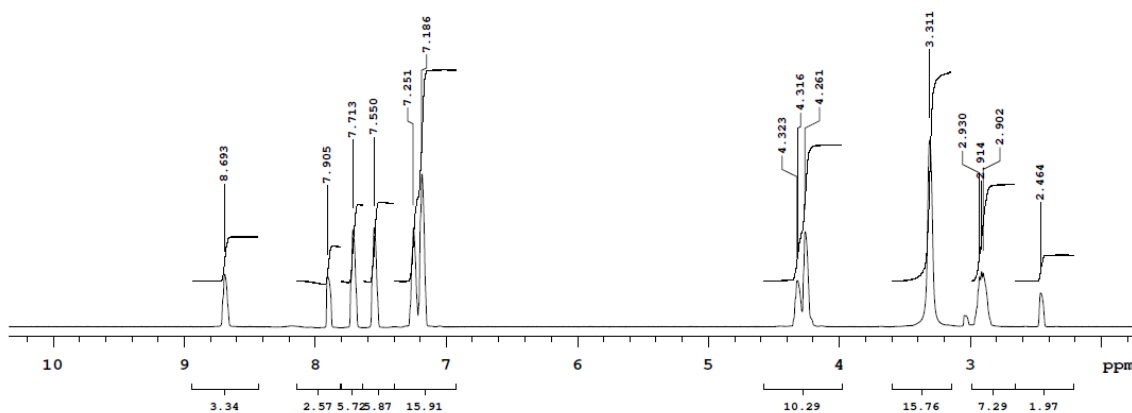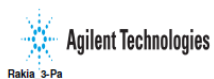

Rakia\_3-Pa  
 Sample Name Rakia\_3-Pa Pulse sequence CARBON Temperature 23  
 Date collected 2019-01-09 Solvent dms0 Spectrometer Agilent-NMR-vnmr500 Study owner vnmr1  
 Operator vnmr1

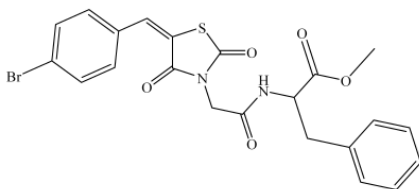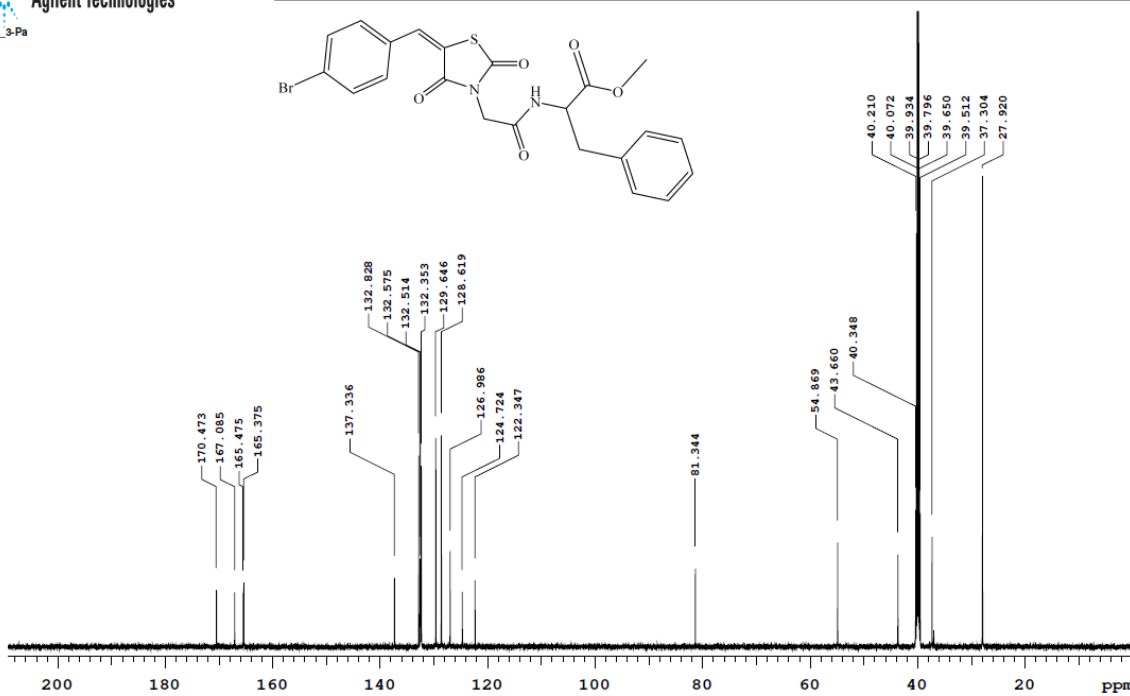

Supplement: s1 [file s1]
